# Supplementary material for: Six New Diterpene Glycosides from the Soft Coral Lemnaliabournei
Source: MDPI journal article supplement (doi:10.3390/md19060339), 2021-06-14
Supplement: s1 [file s1]

## Supplementary Material

# Six New Diterpene Glycosides from the Soft Coral *Lemnalia bournei*

Xia Yan <sup>1</sup>, Han Ouyang <sup>2,\*</sup>, Te Li <sup>1</sup>, Yutong Shi <sup>1</sup>, Bin Wu <sup>3</sup>, Xiaojun Yan <sup>1</sup> and Shan He <sup>1,\*</sup>

<sup>1</sup> Li Dak Sum Yip Yio Chin Kenneth Li Marine Biopharmaceutical Research Center, Department of Marine Pharmacy, College of Food and Pharmaceutical Sciences, Ningbo University, Ningbo 315800, Zhejiang, China; yanxia@nbu.edu.cn (X.Y.); telinbu@163.com (T.L.); shiyutong@nbu.edu.cn (X.Y.); yanxiaojun@nbu.edu.cn (X.Y.)

<sup>2</sup> Institute of Drug Discovery Technology, Ningbo University, Ningbo 315211, China

<sup>3</sup> Ocean College, Zhejiang University, Hangzhou 310058, China; wubin@zju.edu.cn

\* Correspondence: ouyanghan@nbu.edu.cn (H.O.); heshan@nbu.edu.cn (S.H.); Tel.: +86-574-876-09771 (H.O.); +86-574-876-04382 (S.H.)

## Table of Contents

|                                                                                                                    |    |
|--------------------------------------------------------------------------------------------------------------------|----|
| Table of Contents .....                                                                                            | 2  |
| 1. Experimental ECD spectrum of 1 and the calculated one .....                                                     | 3  |
| 2. 1D, 2D NMR and HRMS spectra of the new isolated compounds .....                                                 | 3  |
| 2.1 Spectroscopic data for Lemnabourside E (1) .....                                                               | 3  |
| 3.2 Spectroscopic data for Lemnabourside F (2).....                                                                | 10 |
| 3.3 Spectroscopic data for Lemnabourside G (3).....                                                                | 14 |
| 3.4 Spectroscopic data for Lemnadiolbourside H (4).....                                                            | 19 |
| 3.5 Spectroscopic data for Lemnadiolbourside B (5).....                                                            | 25 |
| 3.6 Spectroscopic data for Lemnadiolbourside C (6).....                                                            | 30 |
| 4. NMR spectrums of the known isolated compounds.....                                                              | 36 |
| 4.1 Spectroscopic data for compound 7 .....                                                                        | 36 |
| 4.2 Spectroscopic data for compound 8 .....                                                                        | 37 |
| 4.3 Spectroscopic data for compound 9 .....                                                                        | 39 |
| 2. <sup>1</sup> H NMR data for bicyclic diterpene aldehyde aglycon and bicyclic diterpene alcohol<br>aglycon ..... | 40 |
| 6. HPLC chromatograms of the sugar derivatives of compounds 1-6 and the standard D-<br>glucose.....                | 43 |
| 7. Photos of <i>Lemnalia bournei</i> underwater and fresh sample after collected.....                              | 45 |
| 8. Photomicrographs of the spicules extracted from <i>Lemnalia bournei</i> .....                                   | 45 |

## 1. Experimental ECD spectrum of 1 and the calculated one

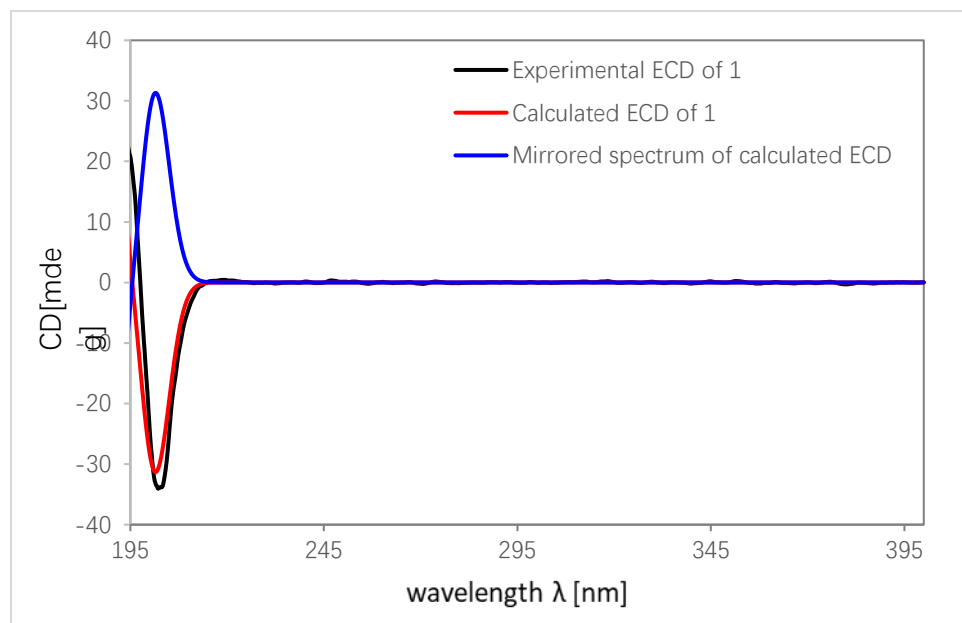

**Figure S1 Experimental ECD spectrum of 1 and the calculated ECD spectra of (5R,6S,10S,11S)-1 (red) and (5S,6R,10R,11R)-1 (blue)**

## 2. 1D, 2D NMR and HRMS spectra of the new isolated compounds

### 2.1 Spectroscopic data for Lemnabourside E (1)

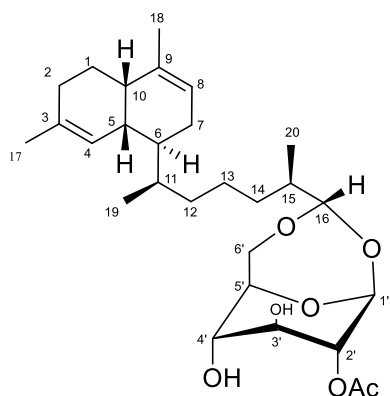

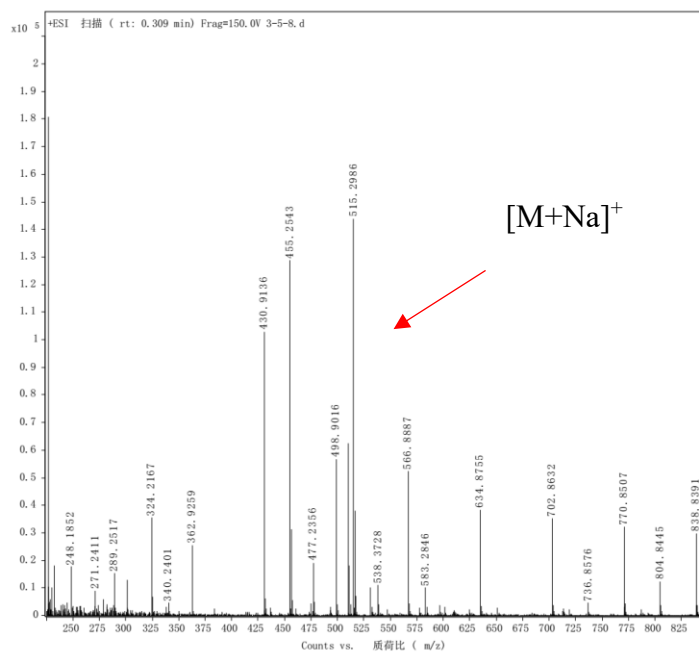

**Figure S2 HRESIMS Spectrum of Lemnabourside E (1)**

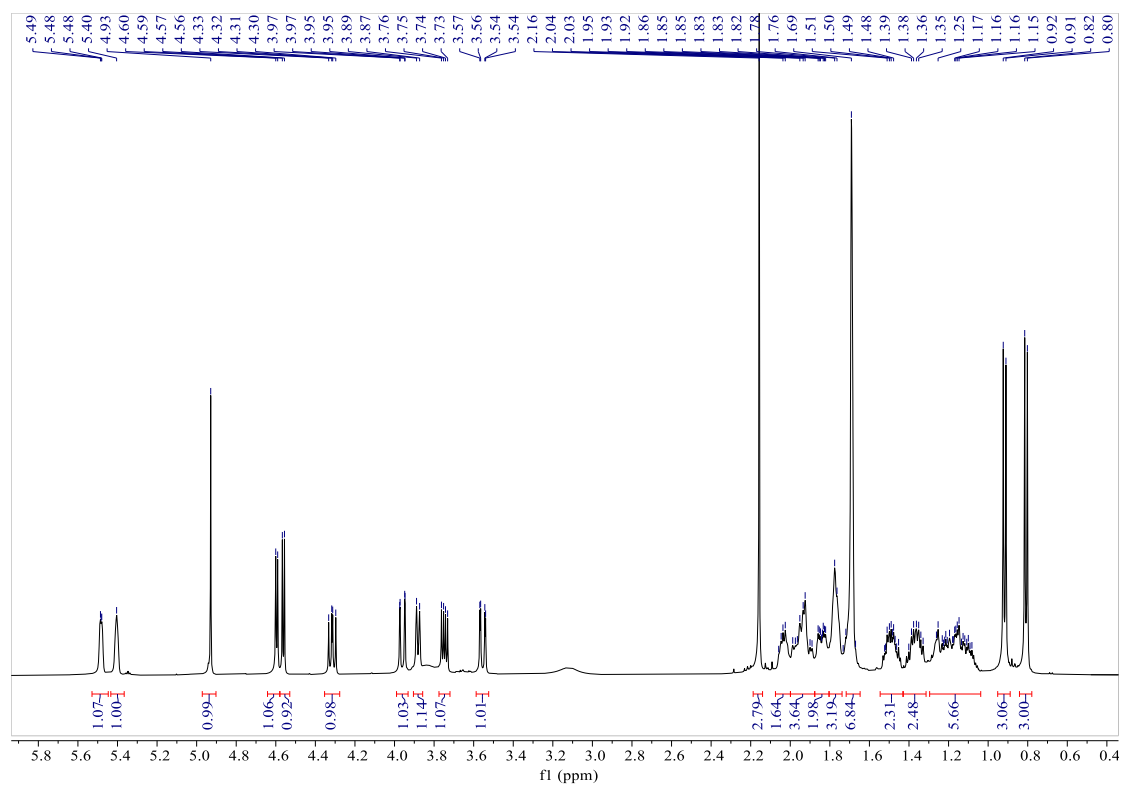

**Figure S3  $^1\text{H}$  NMR Spectrum of Lemnabourside E (1) (600 MHz;  $\text{CDCl}_3$ )**

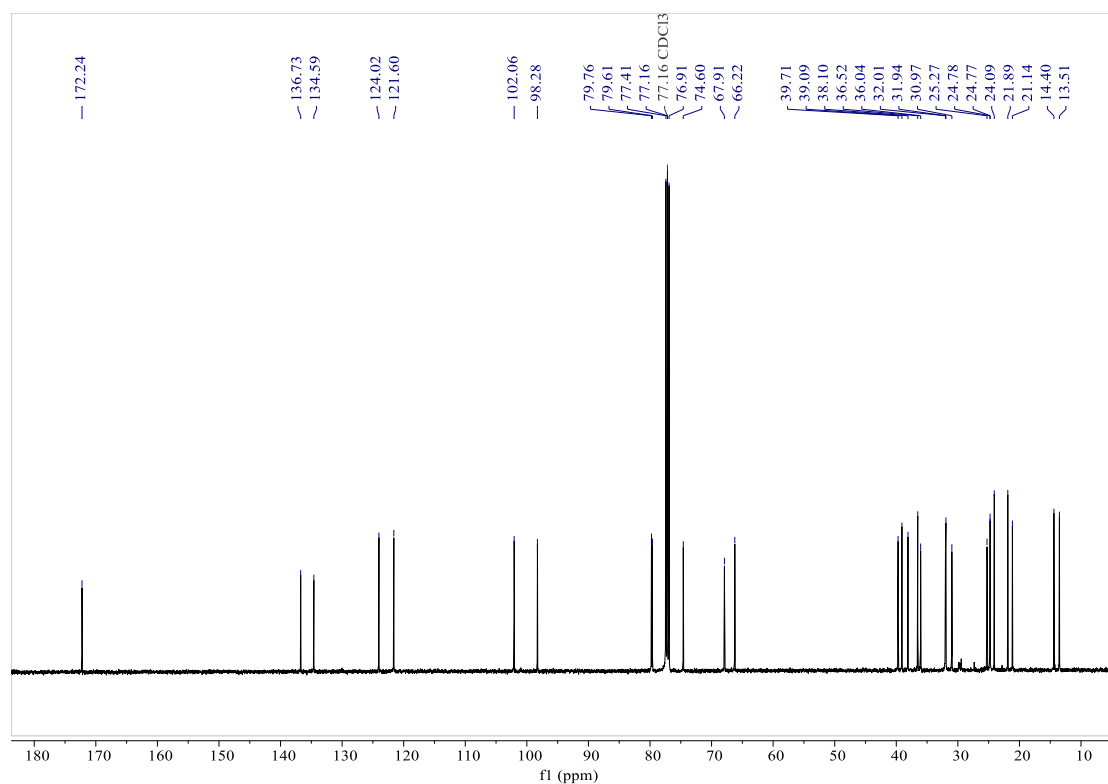

**Figure S4  $^{13}\text{C}$  NMR Spectrum of Lemnabourside E (1) (150 MHz;  $\text{CDCl}_3$ )**

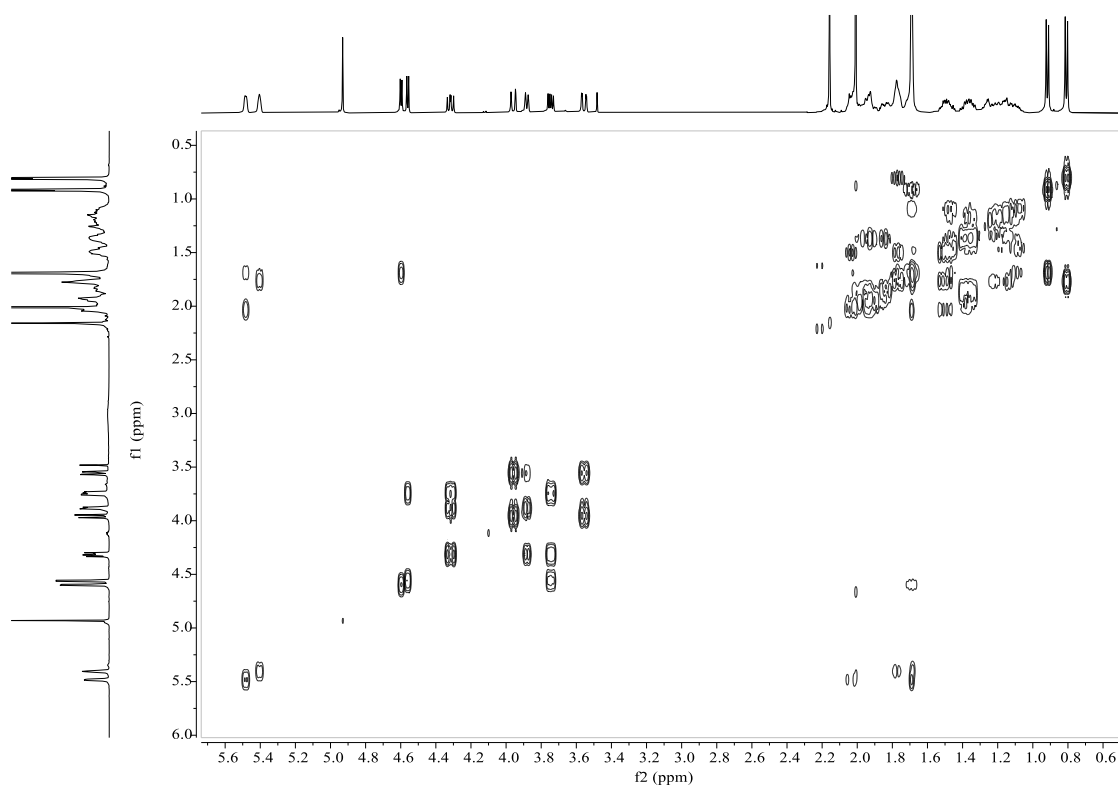

**Figure S5  $^1\text{H}$ - $^1\text{H}$  COSY spectrum of Lemnabourside E (1) (600 MHz;  $\text{CDCl}_3$ )**

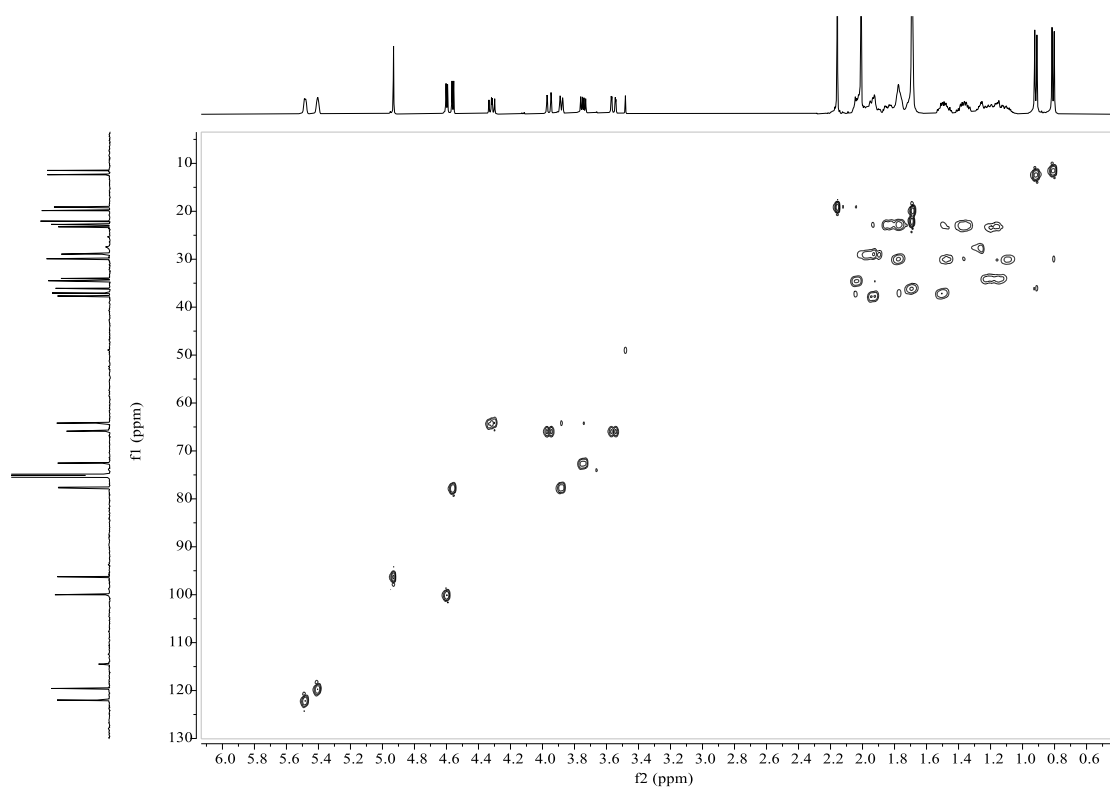

**Figure S6 HSQC spectrum of Lemnabourside E (1) (600 MHz; CDCl<sub>3</sub>)**

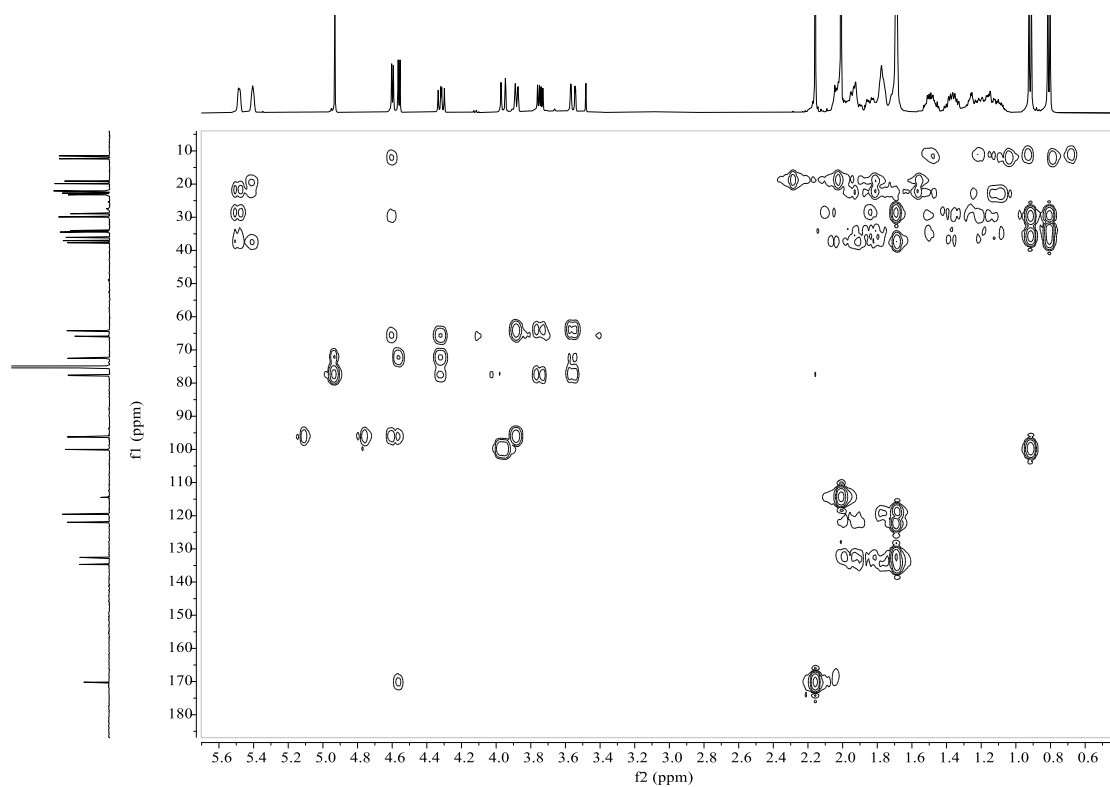

**Figure S7 HMBC spectrum of Lemnabourside E (1) (600 MHz; CDCl<sub>3</sub>)**

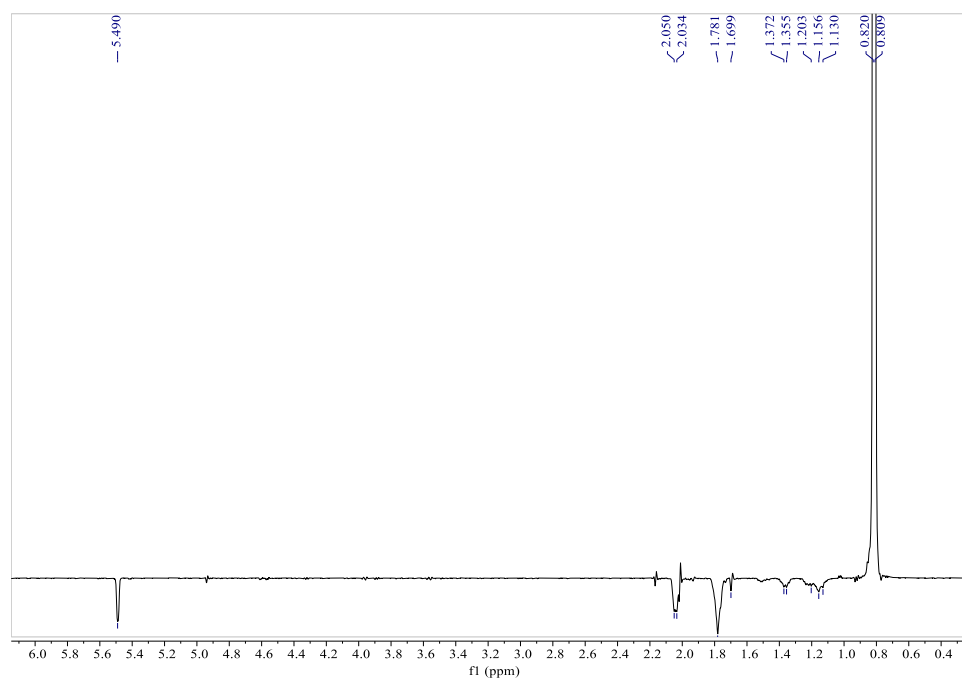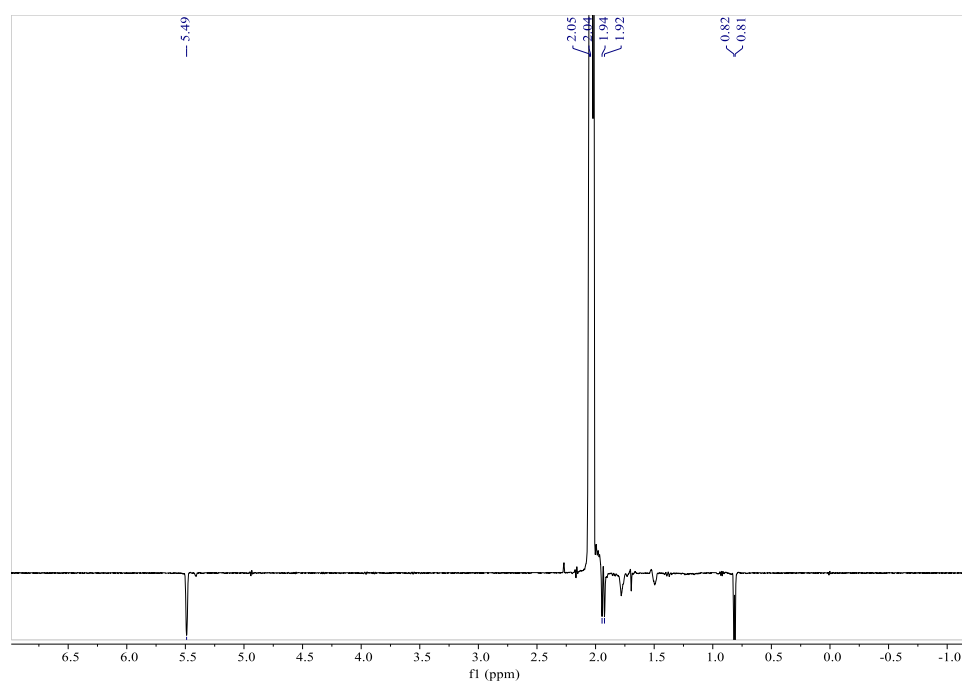

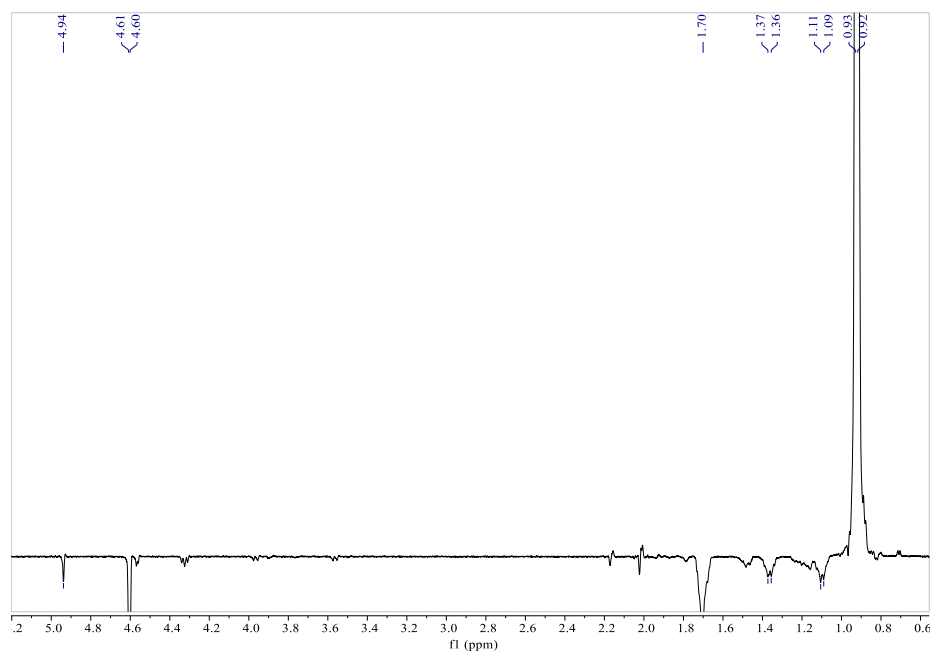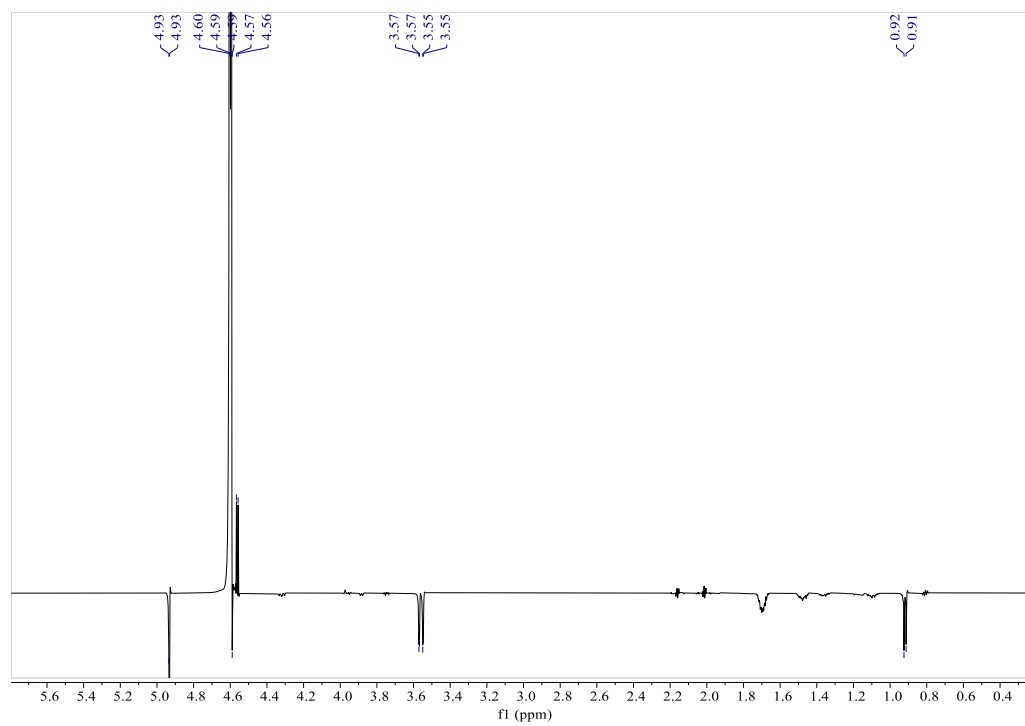



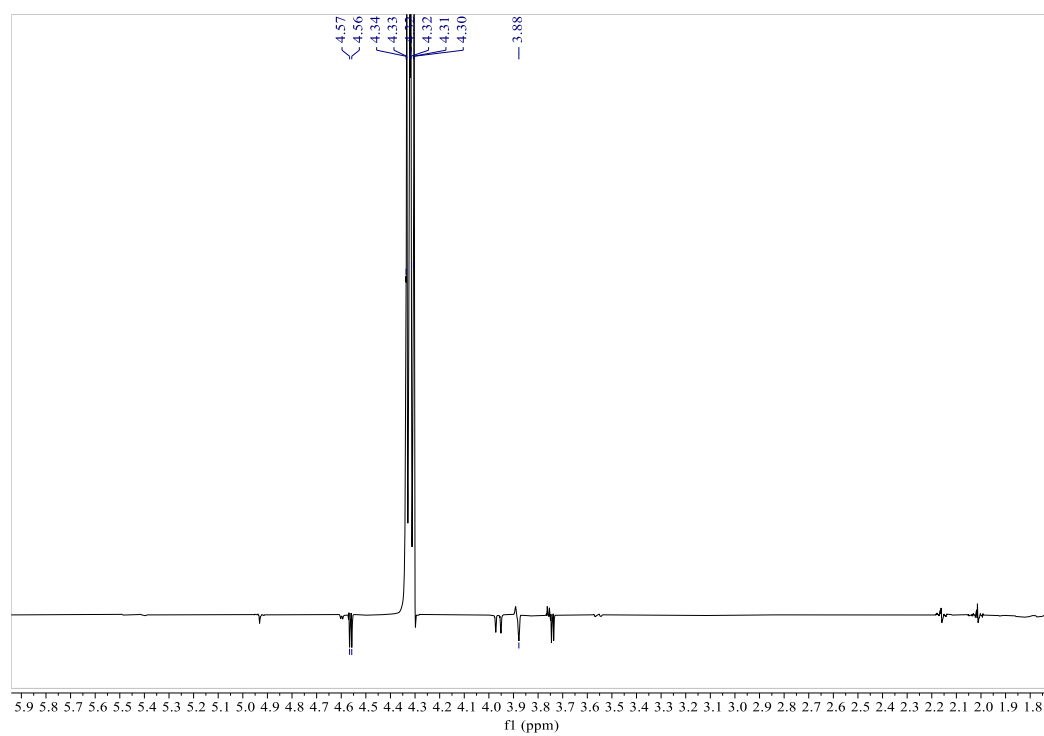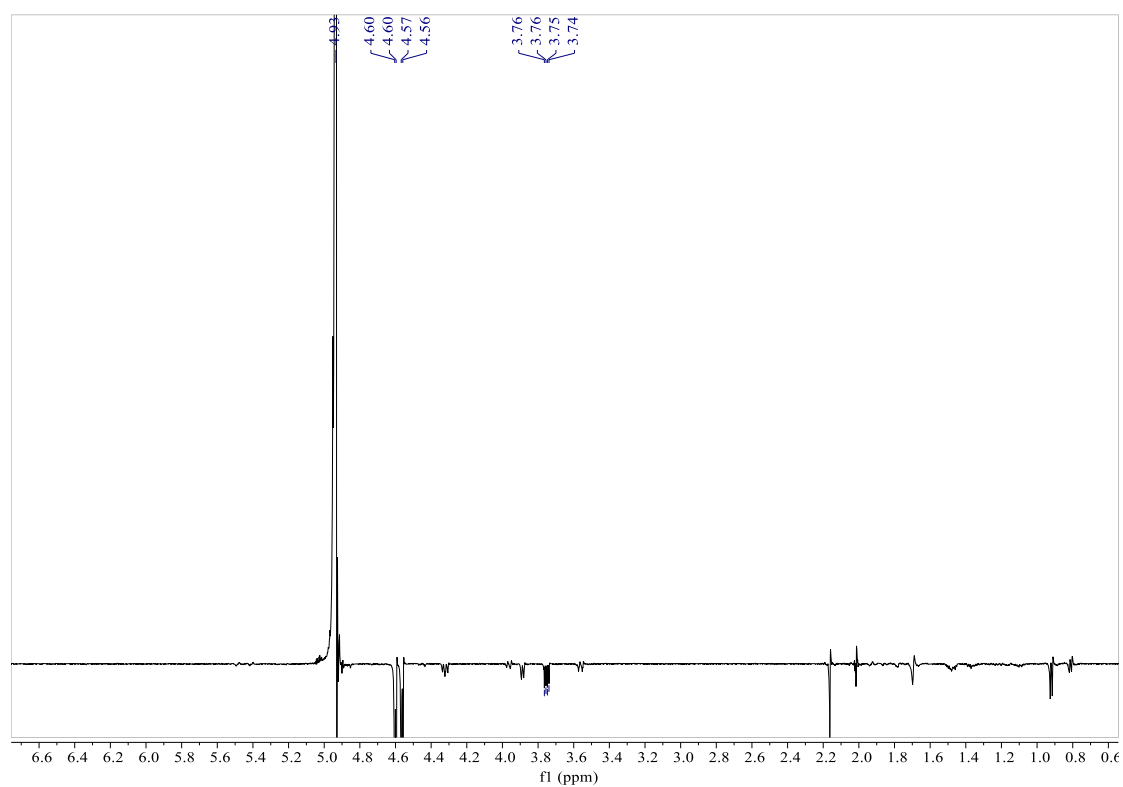

**Figure S8 1D-NOE spectrum of Lemnabourside E (1) (600 MHz; CDCl<sub>3</sub>)**

### 3.2 Spectroscopic data for Lemnabourside F (2)

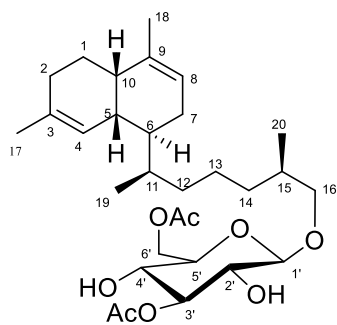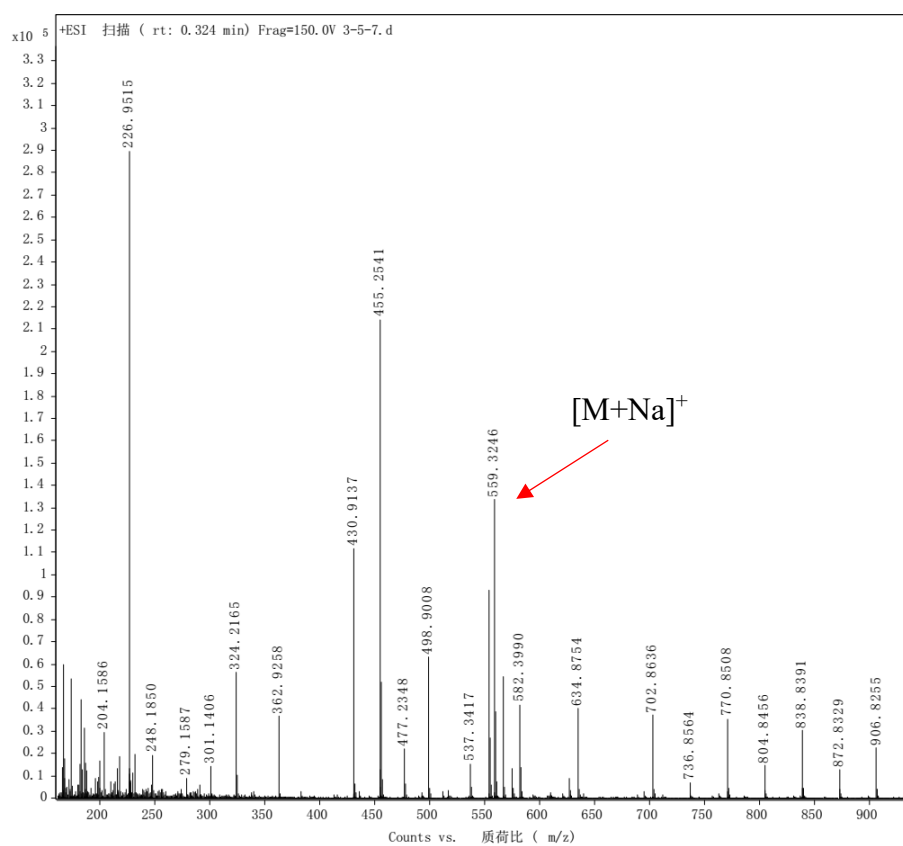

Figure S9 HRESIMS Spectrum of Lemnabourside F (2)

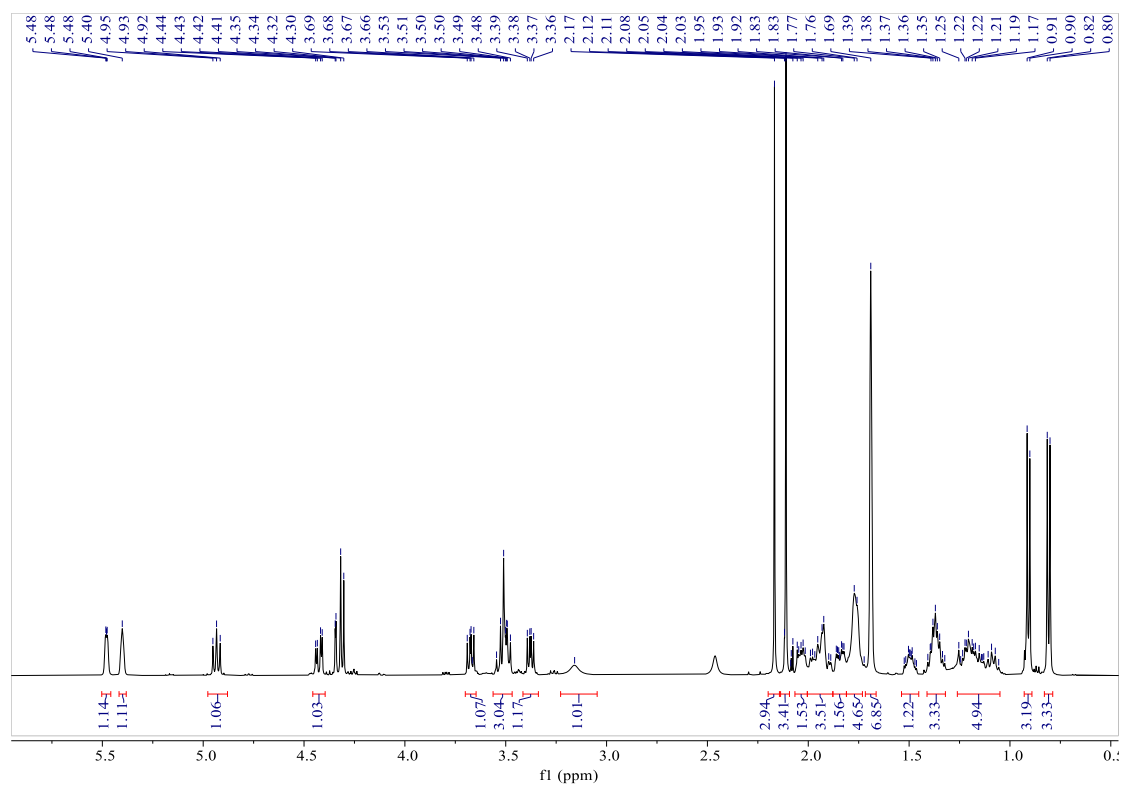

**Figure S10 <sup>1</sup>H NMR Spectrum of Lemnabourside F (2) (600 MHz; CDCl<sub>3</sub>)**

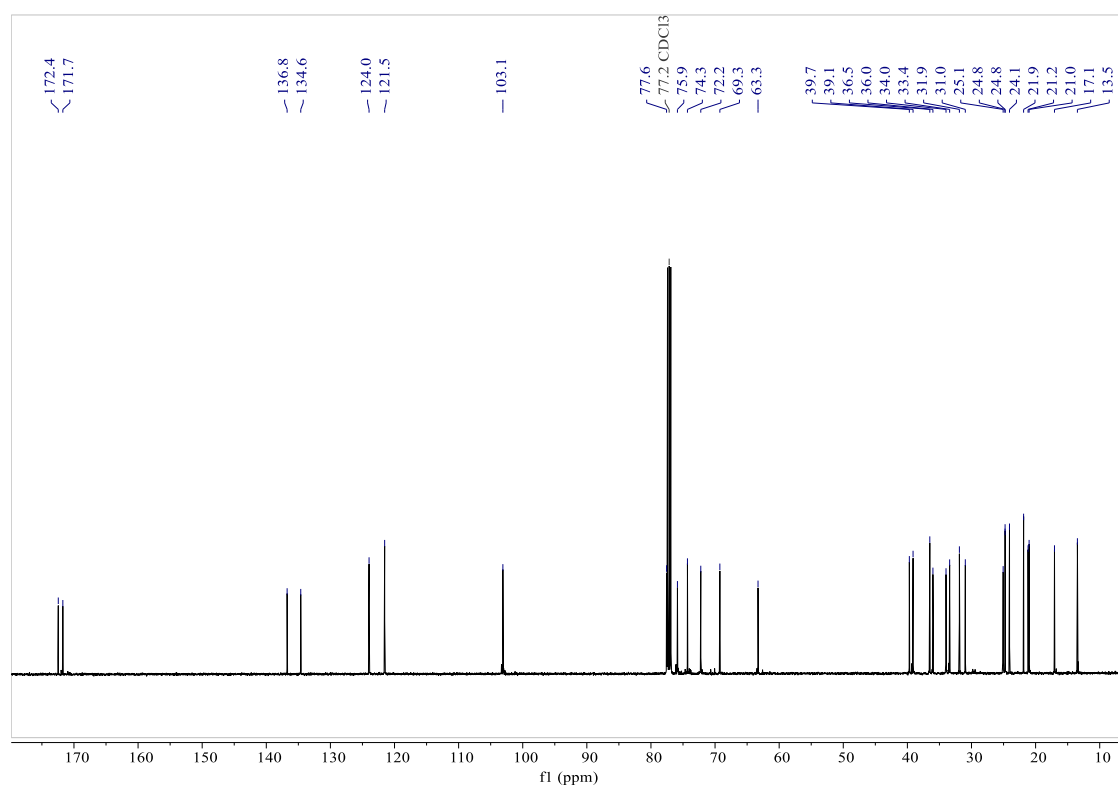

**Figure S11 <sup>13</sup>C NMR Spectrum of Lemnabourside F (2) (150 MHz; CDCl<sub>3</sub>)**

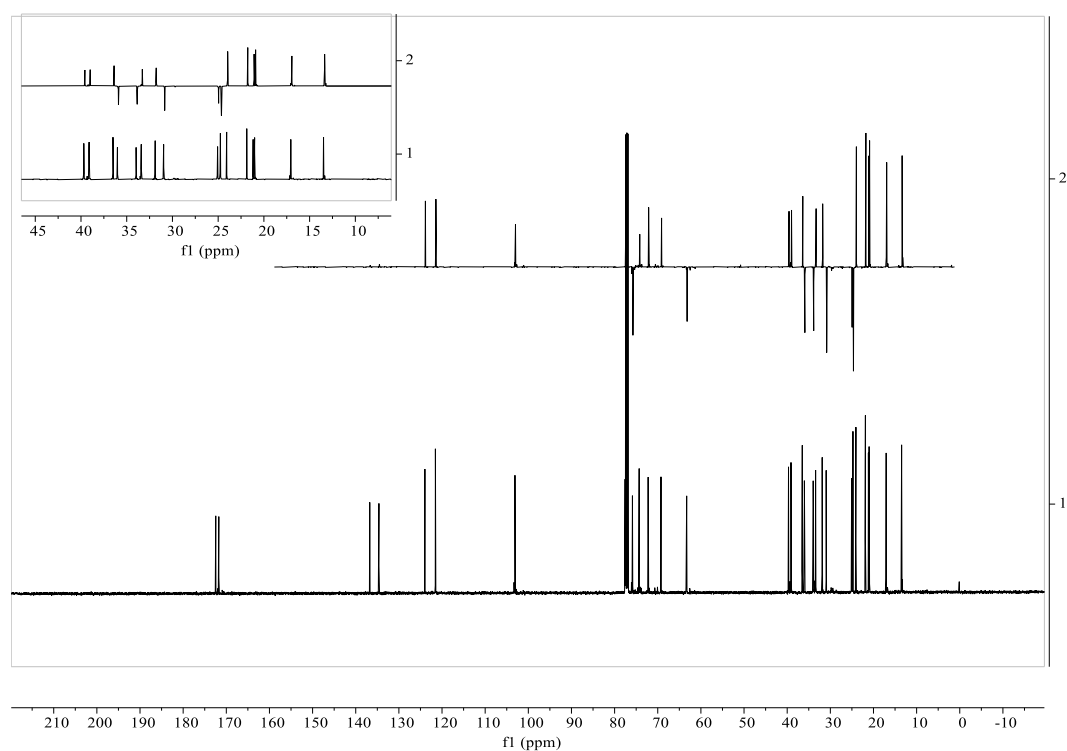

**Figure S12 DEPT 135° NMR Spectrum of Lemnabourside F (2) (150 MHz; CDCl<sub>3</sub>)**

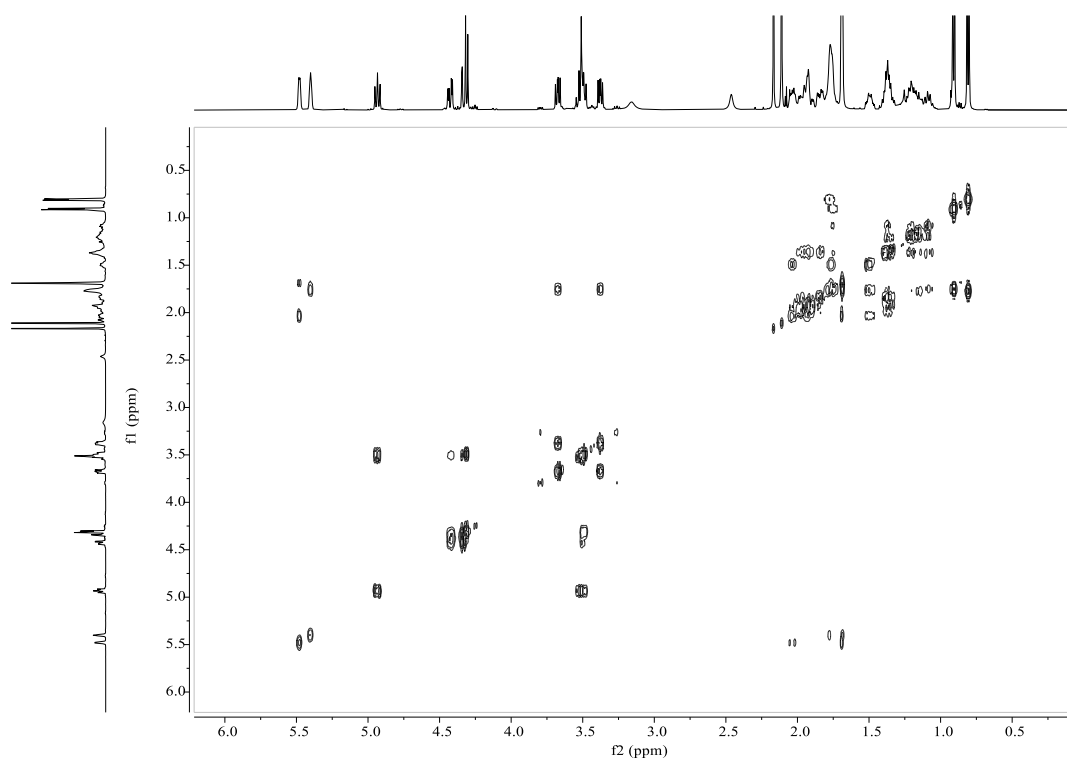

**Figure S13 <sup>1</sup>H-<sup>1</sup>H COSY spectrum of Lemnabourside F (2) (600 MHz; CDCl<sub>3</sub>)**

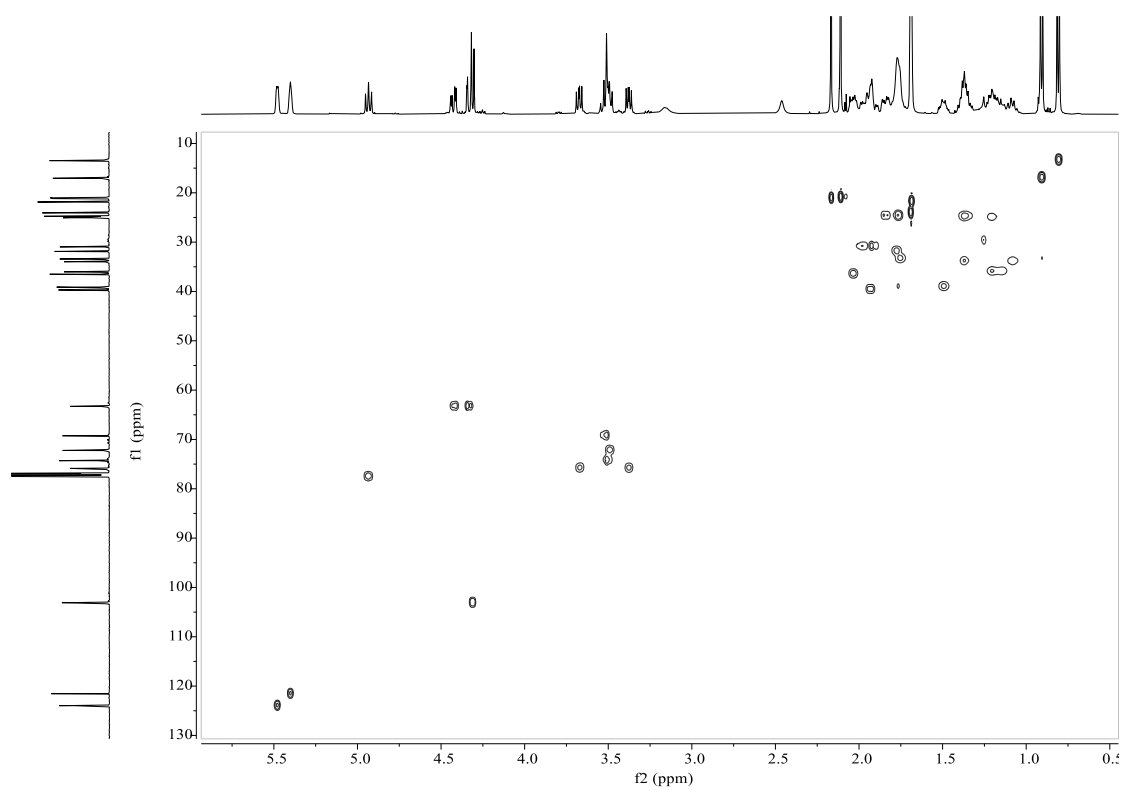

**Figure S14 HSQC spectrum of Lemnabourside F (2) (600 MHz; CDCl<sub>3</sub>)**

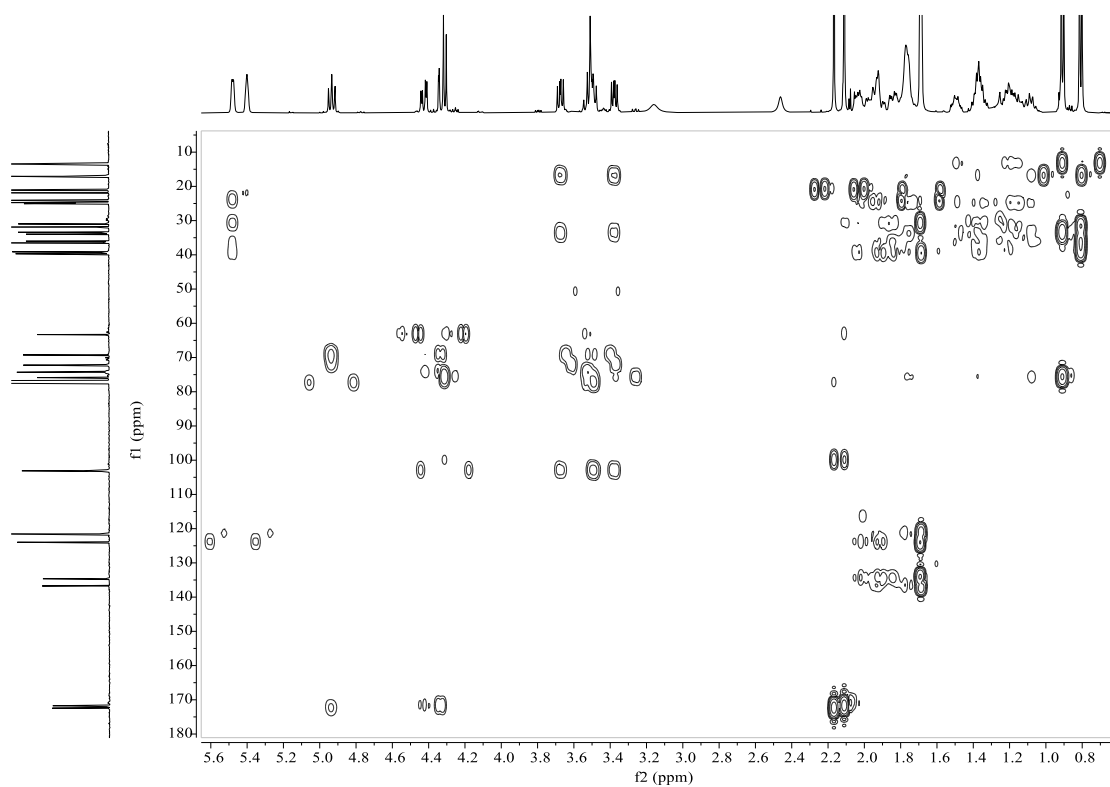

**Figure S15 HMBC spectrum of Lemnabourside F (2) (600 MHz; CDCl<sub>3</sub>)**

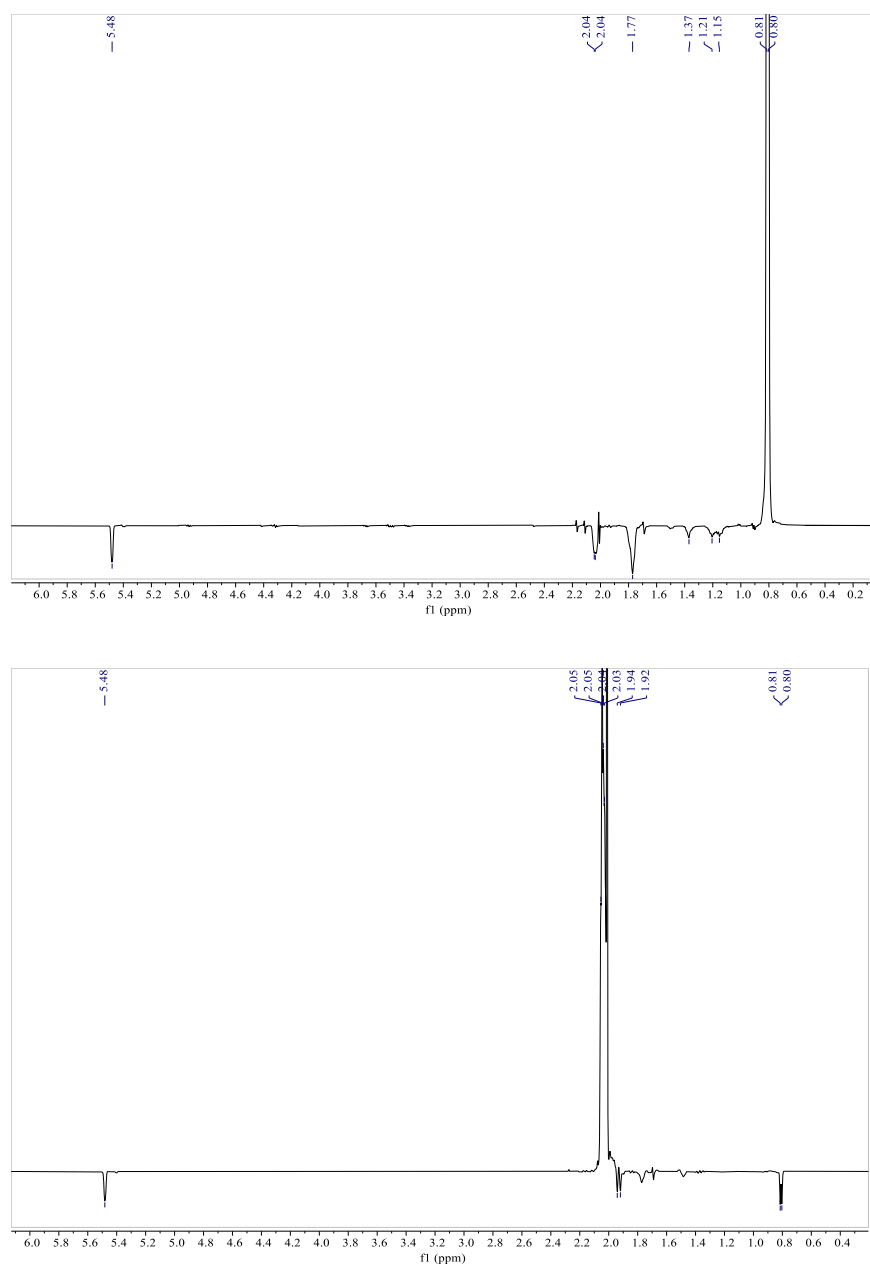

**Figure S16 1D-NOE spectrum of Lemnabourside F (2) (600 MHz; CDCl<sub>3</sub>)**

### 3.3 Spectroscopic data for Lemnabourside G (3)

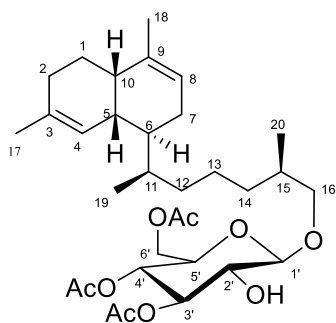

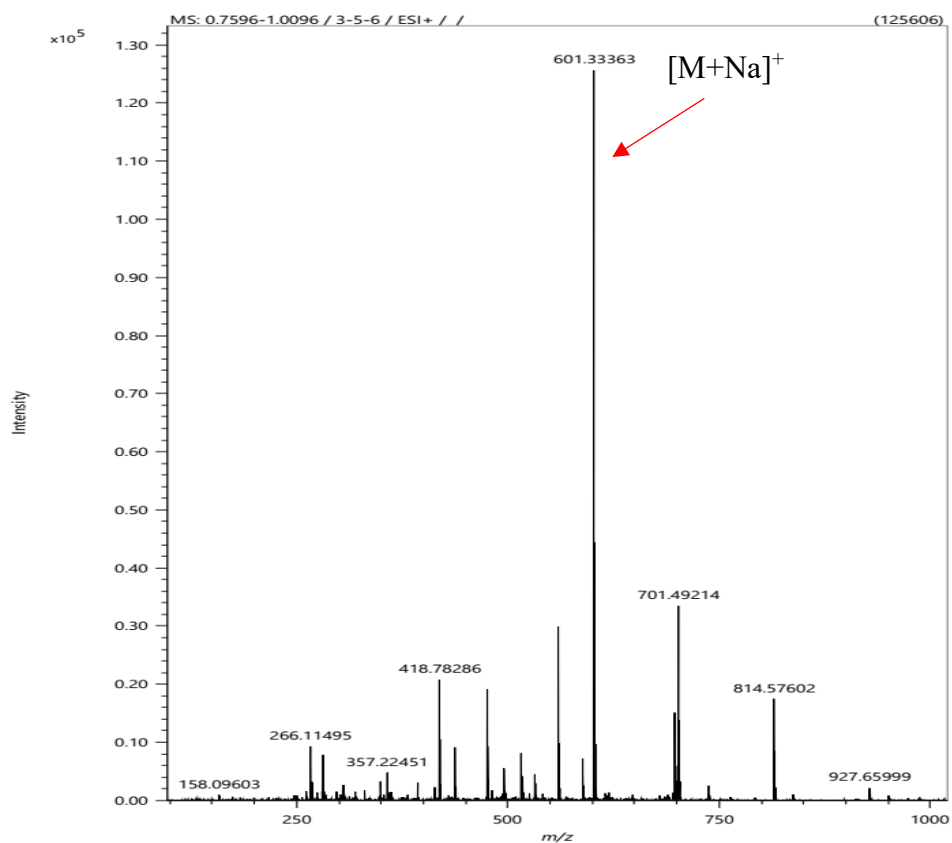

**Figure S17 HRESIMS Spectrum of Lemnabourside G (3)**

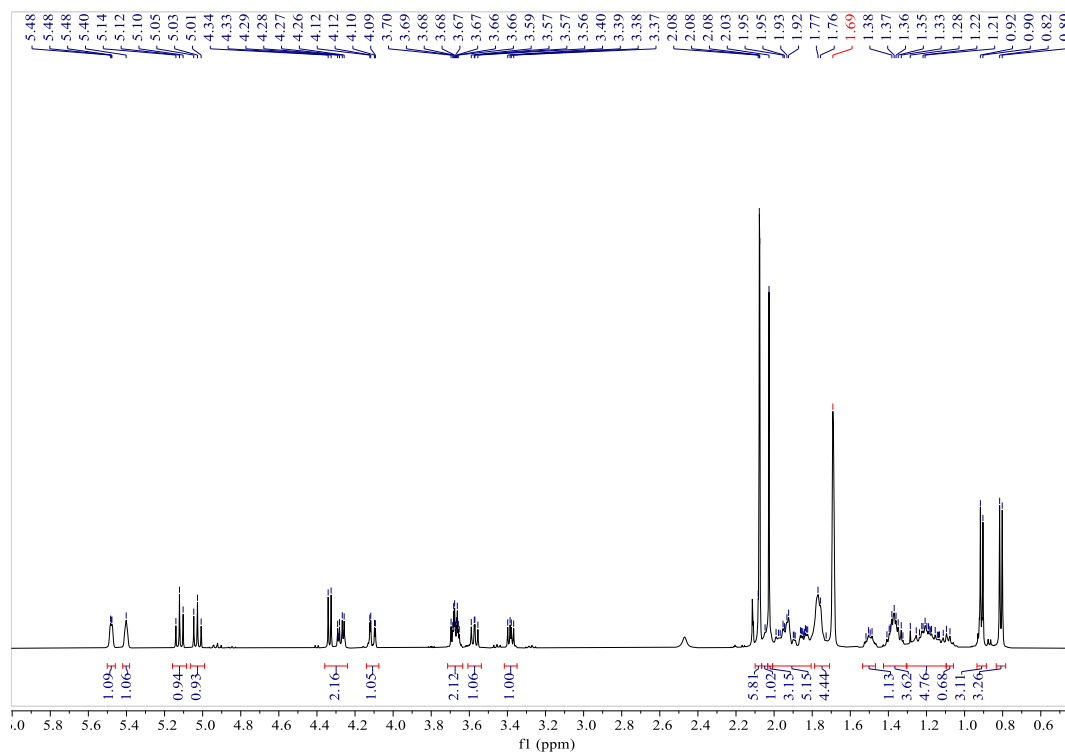

**Figure S18  $^1\text{H}$  NMR Spectrum of Lemnabourside G (3) (600 MHz;  $\text{CDCl}_3$ )**

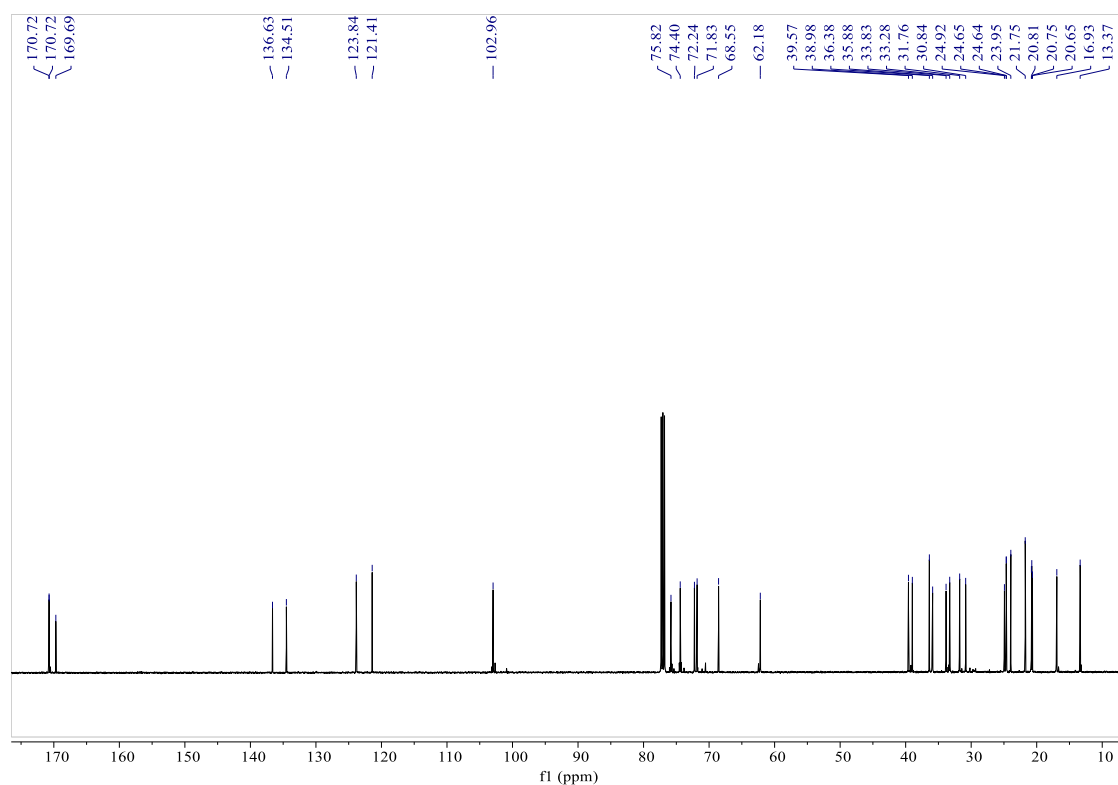

**Figure S19  $^{13}\text{C}$  NMR Spectrum of Lemnabourside G (3) (150 MHz;  $\text{CDCl}_3$ )**

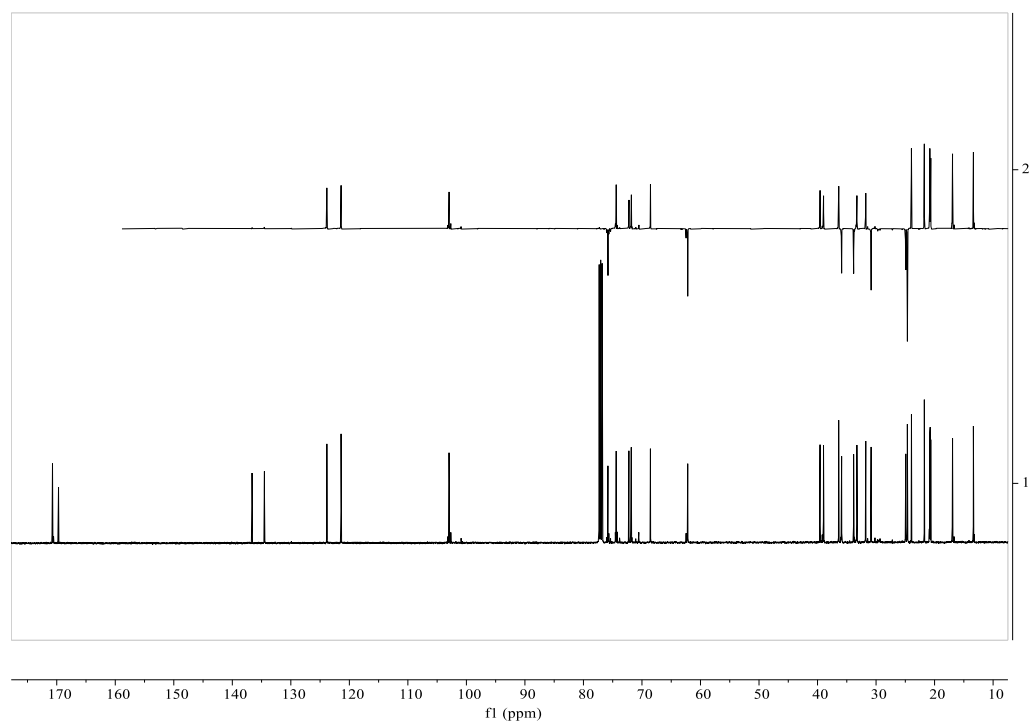

**Figure S20 Dept 135° NMR Spectrum of Lemnabourside G (3) (150 MHz;  $\text{CDCl}_3$ )**



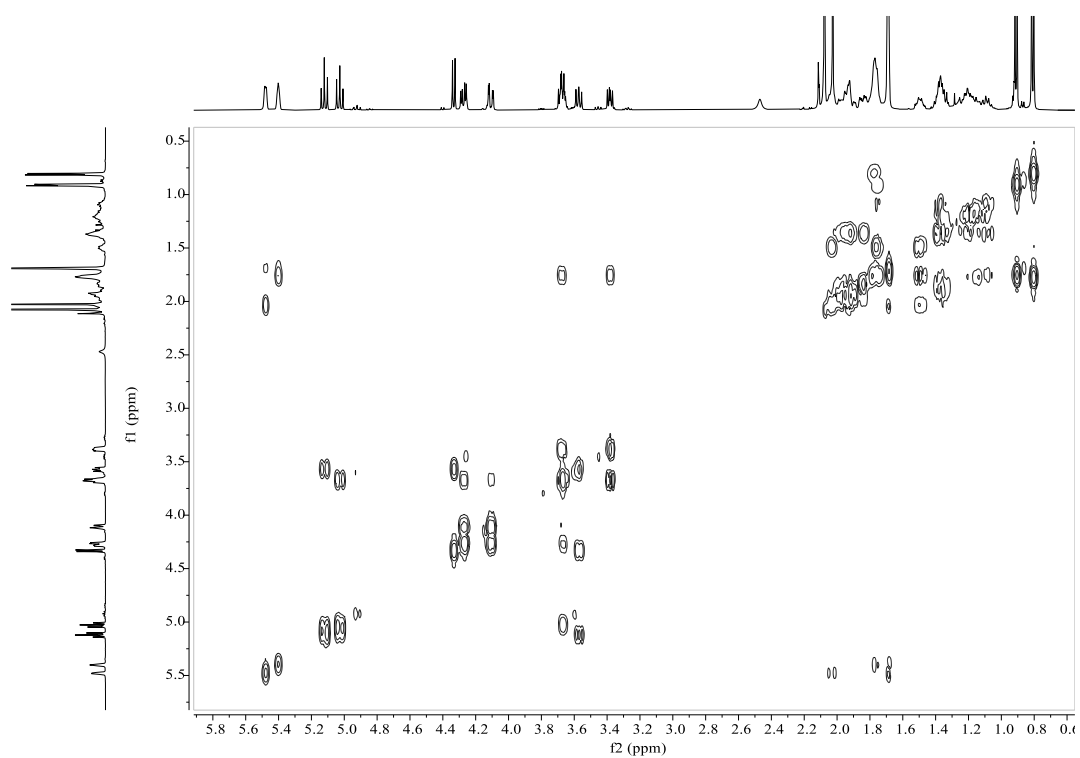

**Figure S21  $^1\text{H}$ - $^1\text{H}$  COSY spectrum of Lemnabourside G (3) (600 MHz;  $\text{CDCl}_3$ )**

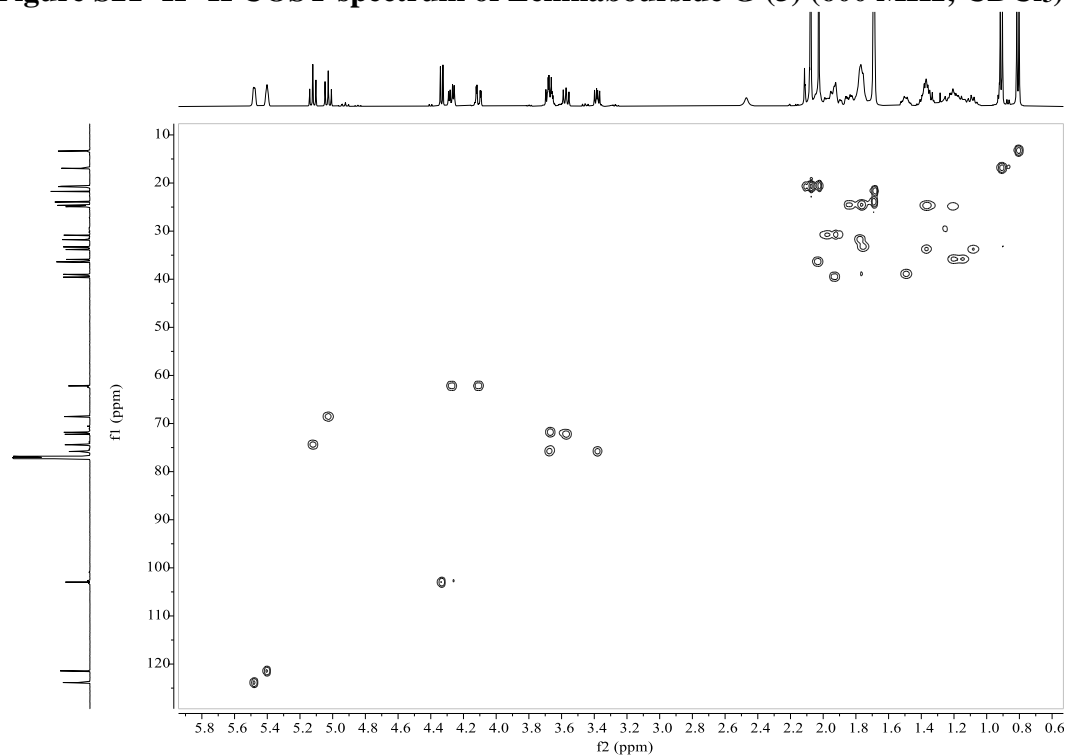

**Figure S22 HSQC spectrum of Lemnabourside G (3) (600 MHz;  $\text{CDCl}_3$ )**

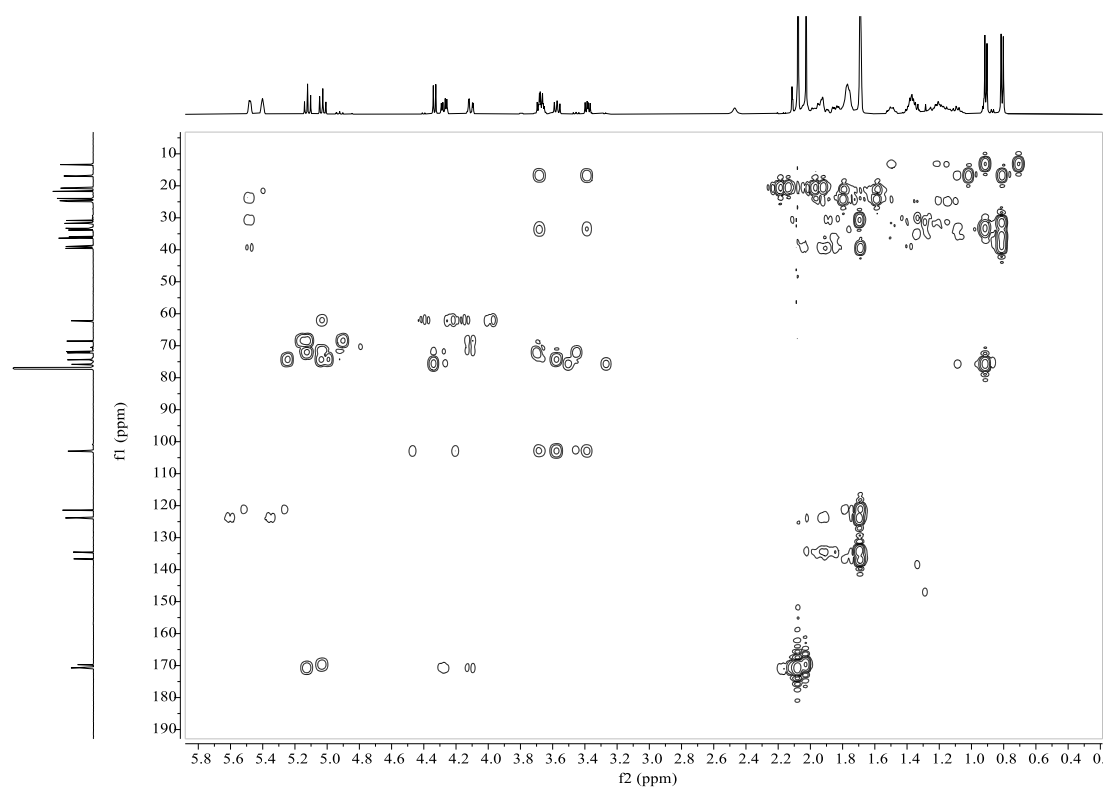

**Figure S23 HMBC spectrum of Lemnabourside G (3) (600 MHz; CDCl<sub>3</sub>)**

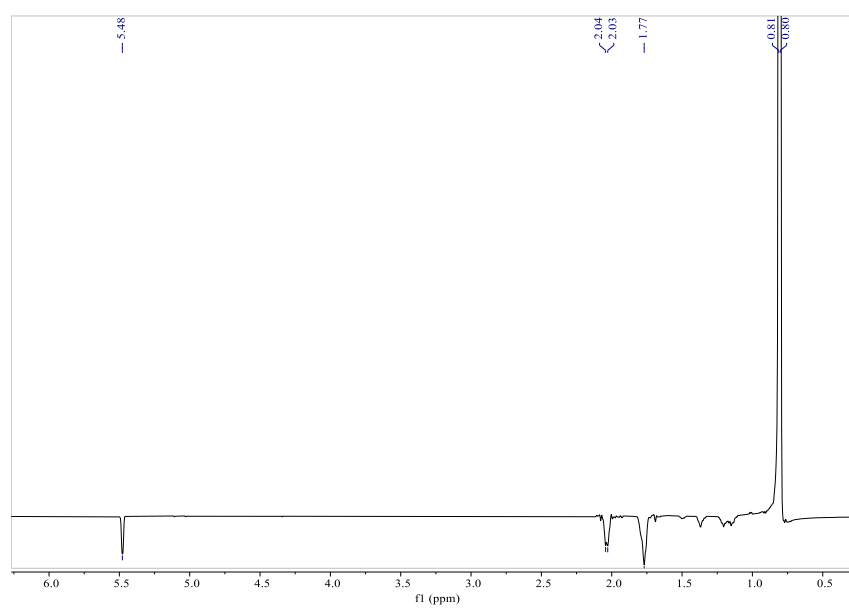

**Figure S24 1D-NOE spectrum of Lemnabourside G (3) (600 MHz; CDCl<sub>3</sub>)**

### 3.4 Spectroscopic data for Lemnadiolbourside H (4)

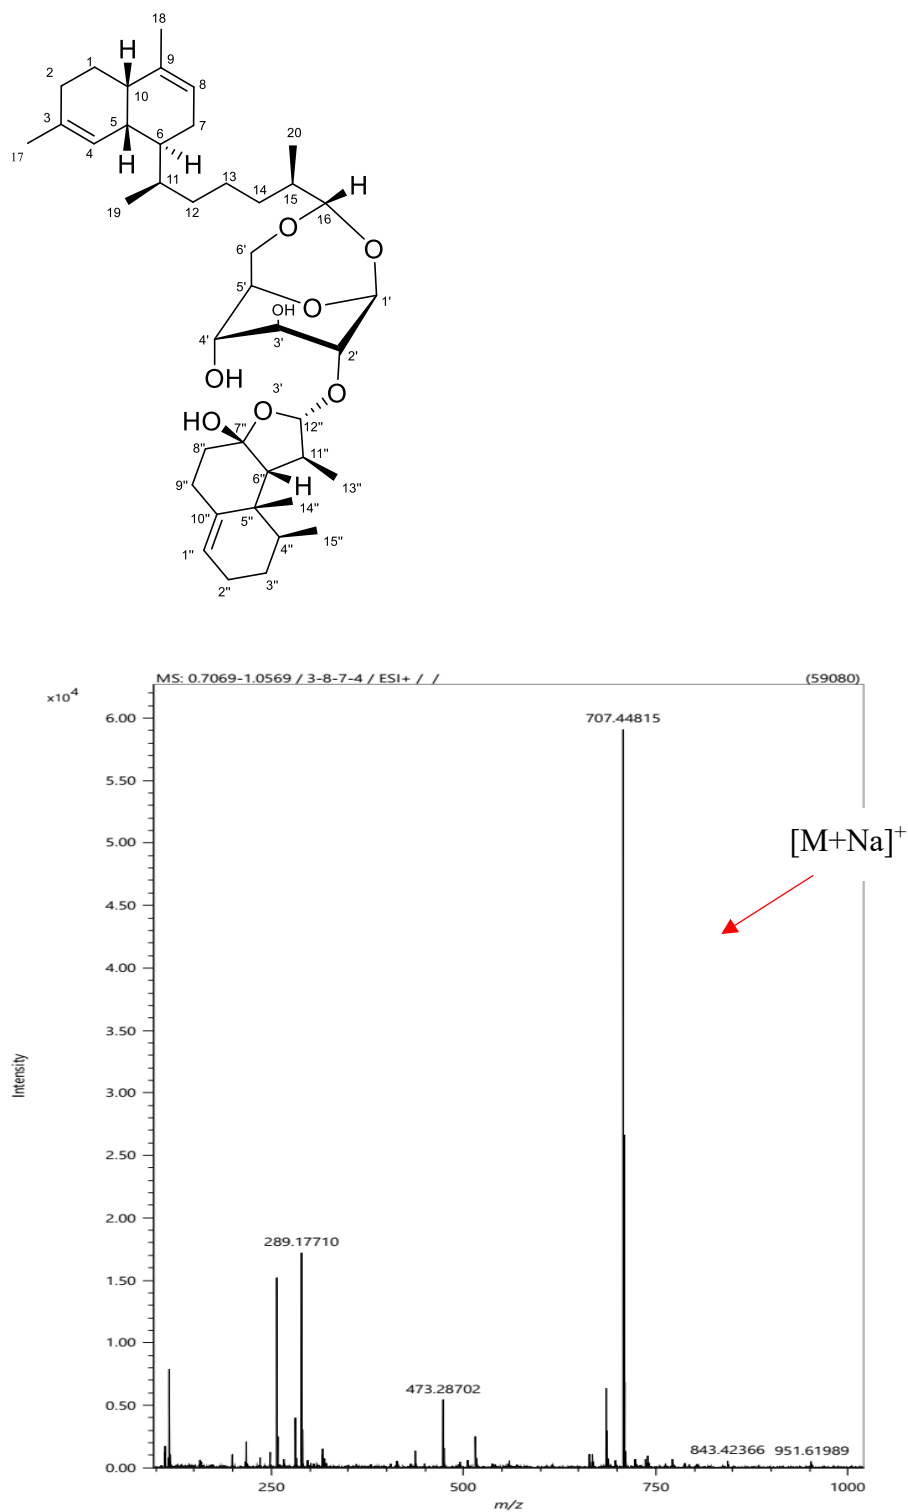

Figure S25 HRESIMS Spectrum of Lemnadiolbourside A (4)

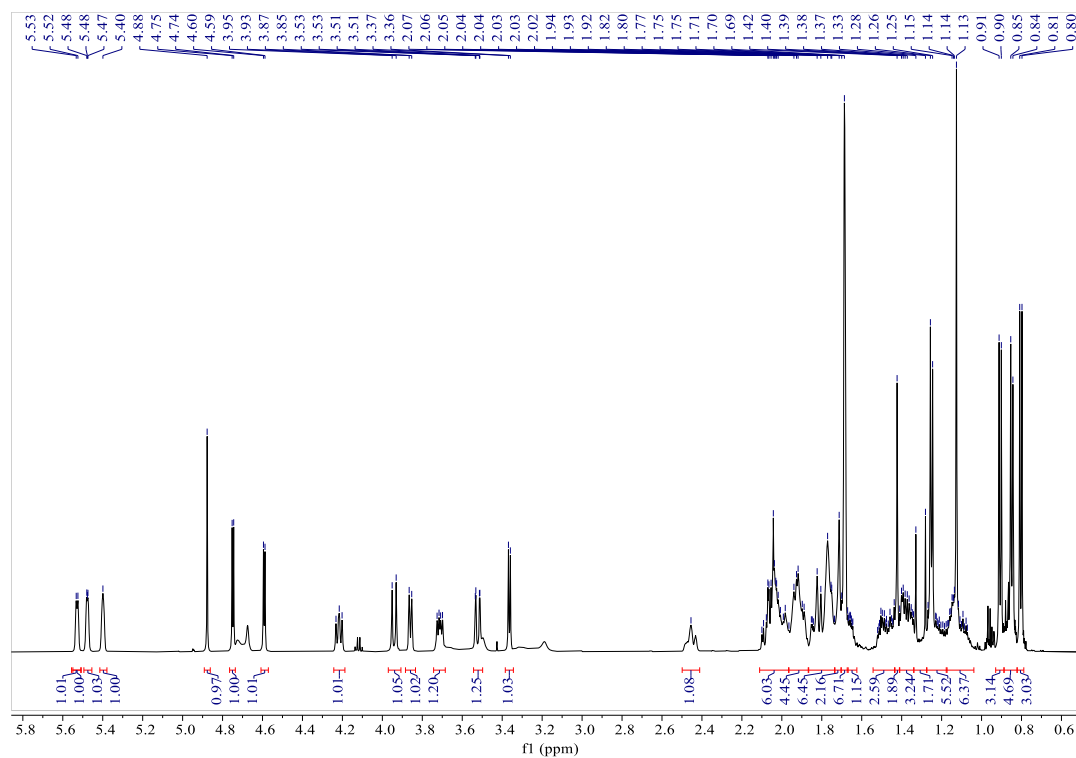

**Figure S26 <sup>1</sup>H NMR Spectrum of Lemnadiolbourside A (4) (600 MHz; CDCl<sub>3</sub>)**

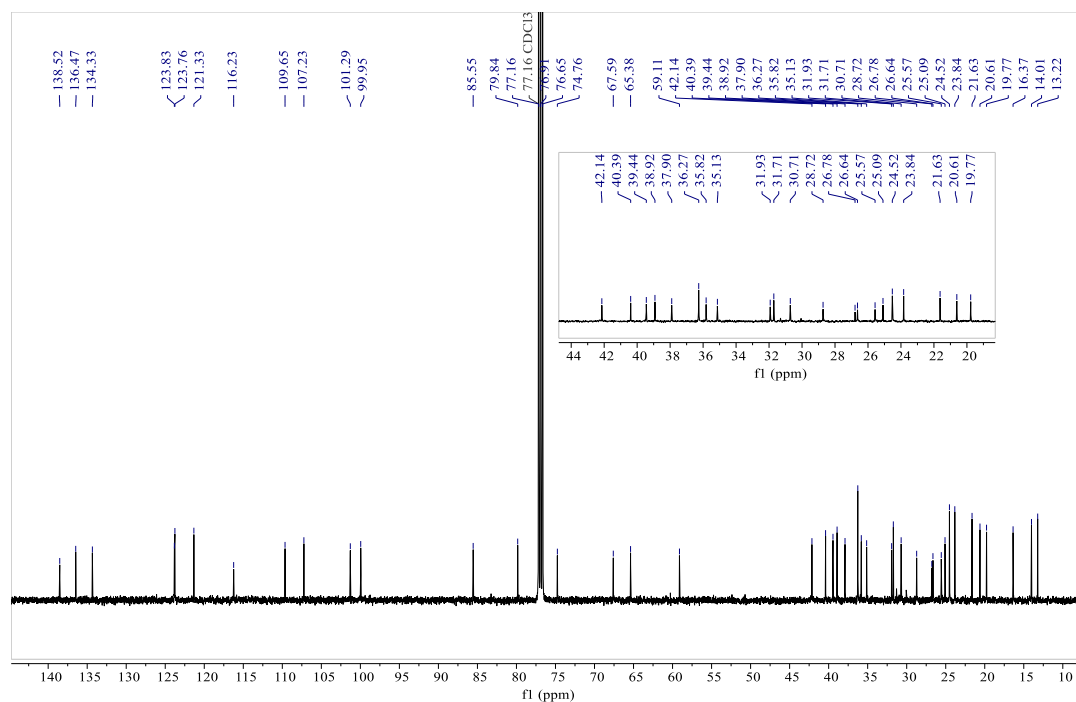

**Figure S27 <sup>13</sup>C NMR Spectrum of Lemnadiolbourside A (4) (150 MHz; CDCl<sub>3</sub>)**

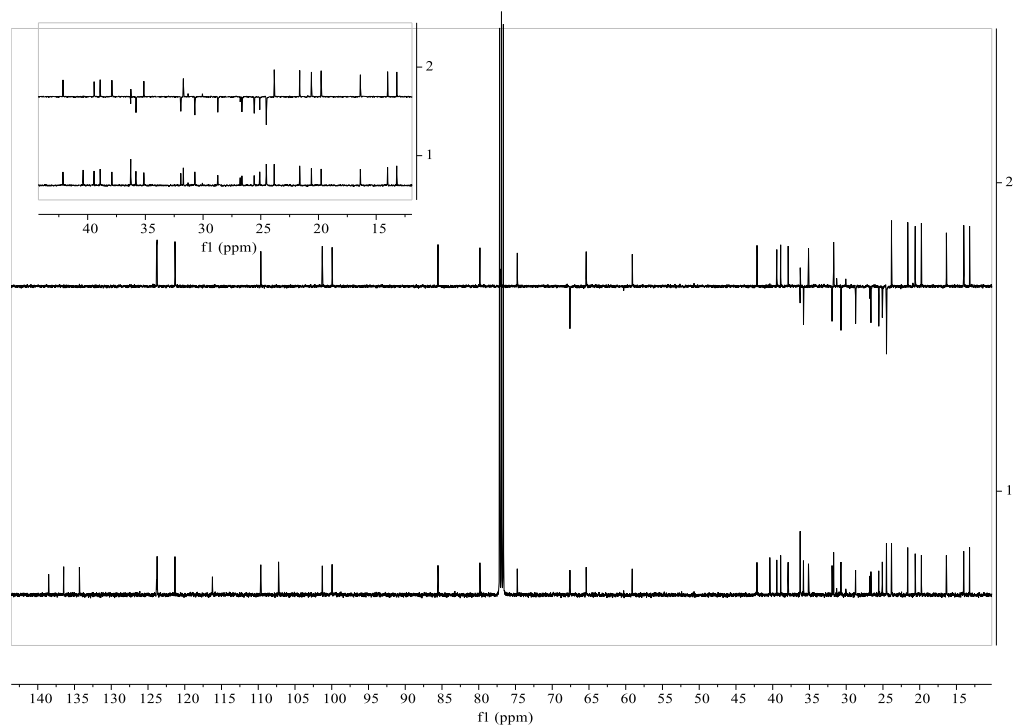

**Figure S28** Dept  $135^\circ$  NMR Spectrum of Lemnadiolbourside A (4) (150 MHz;  $\text{CDCl}_3$ )

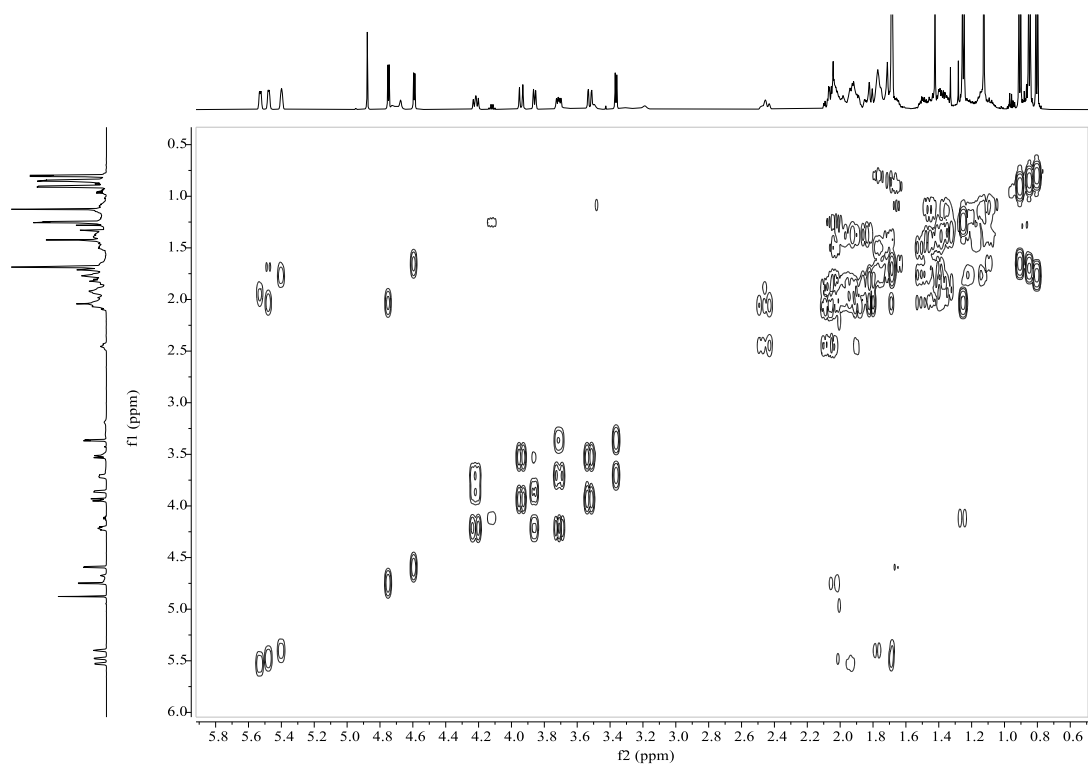

**Figure S29**  $^1\text{H}$ - $^1\text{H}$  COSY spectrum of Lemnadiolbourside A (4) (600 MHz;  $\text{CDCl}_3$ )

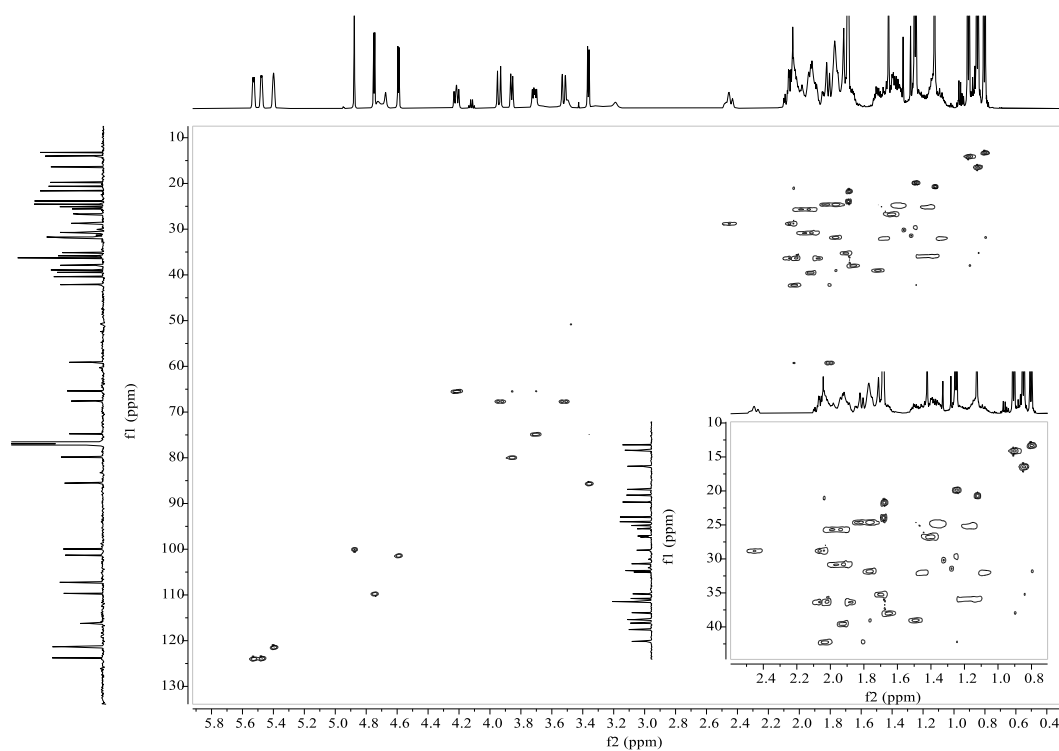

**Figure S30 HSQC spectrum of Lemnadiolbourside A (4) (600 MHz; CDCl<sub>3</sub>)**

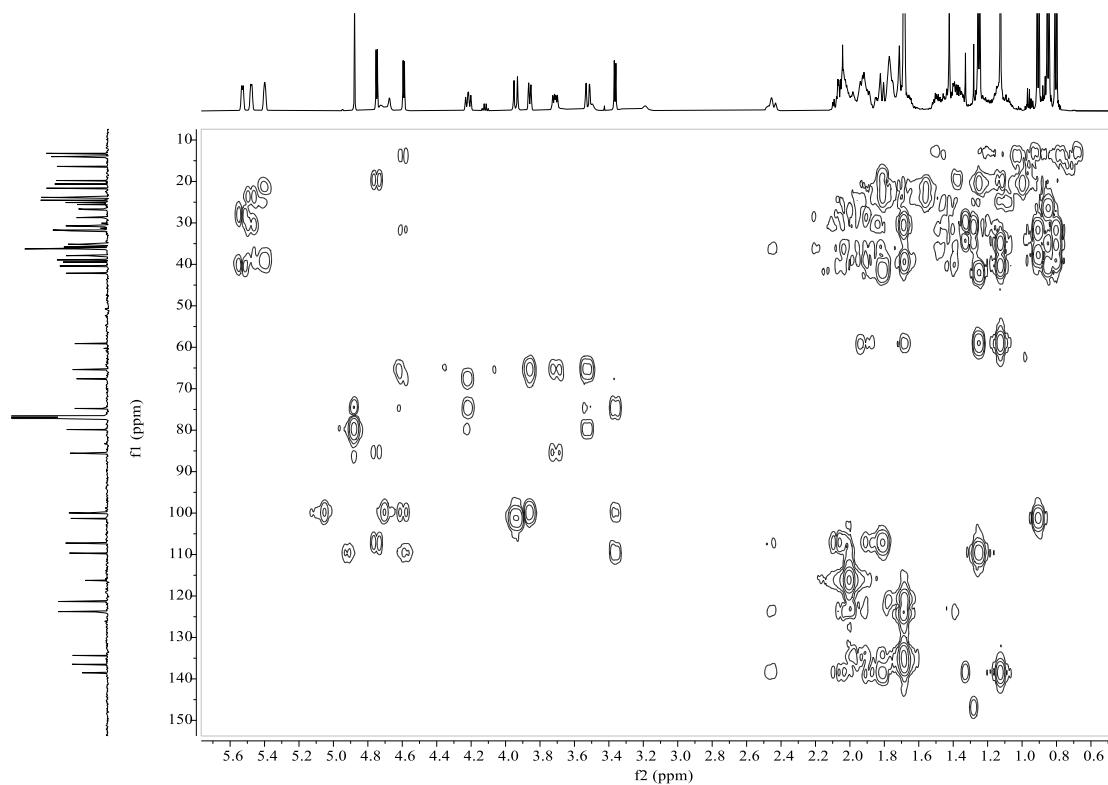

**Figure S31 HMBC spectrum of Lemnadiolbourside A (4) (600 MHz; CDCl<sub>3</sub>)**

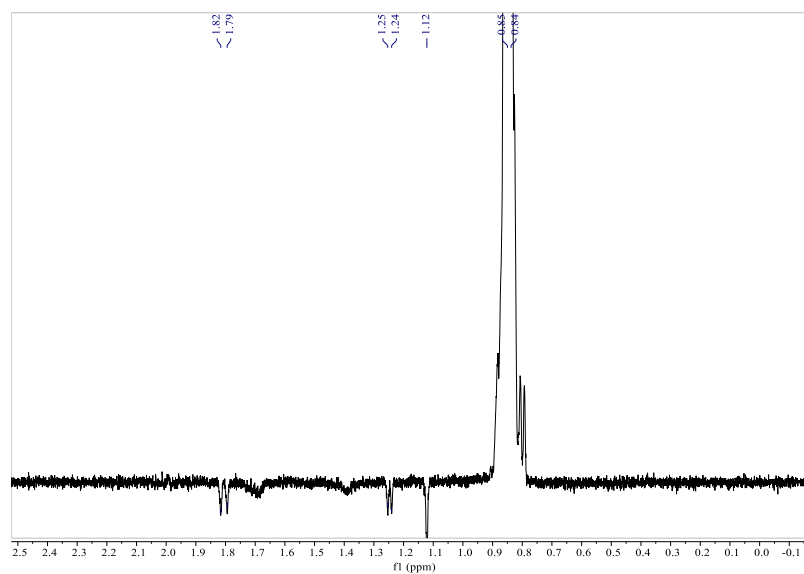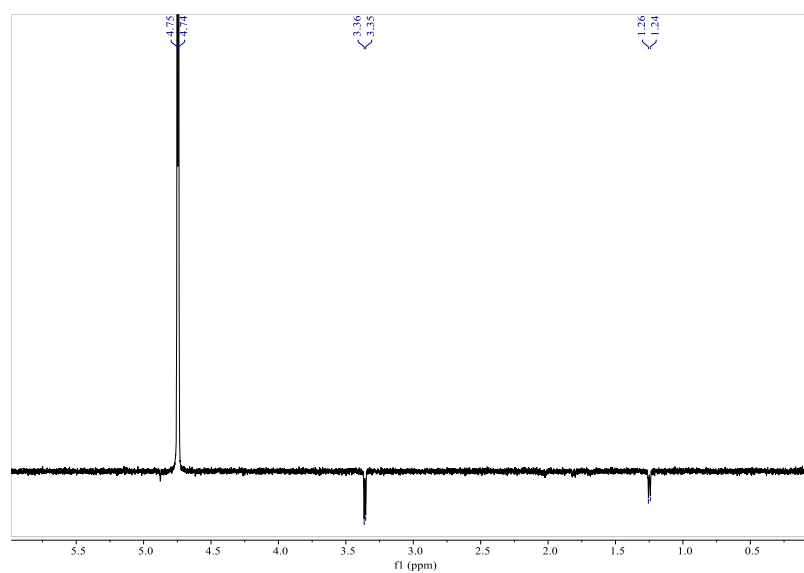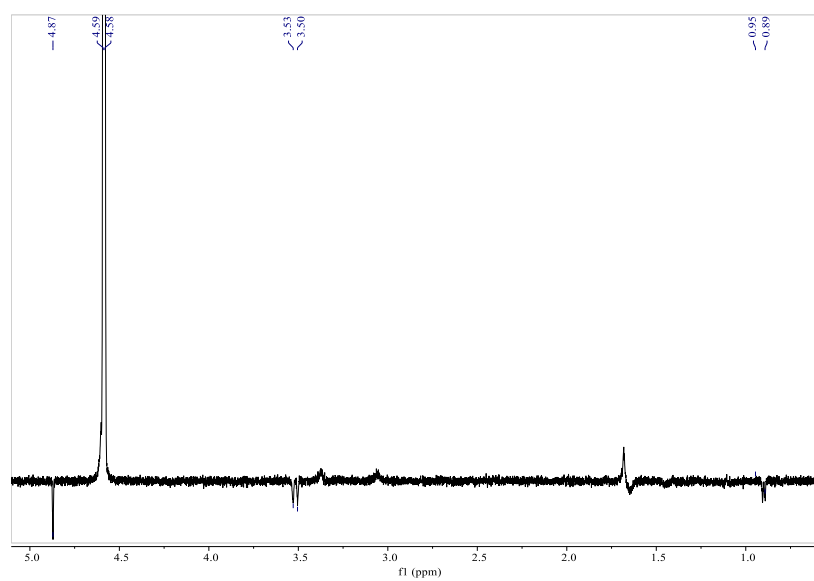

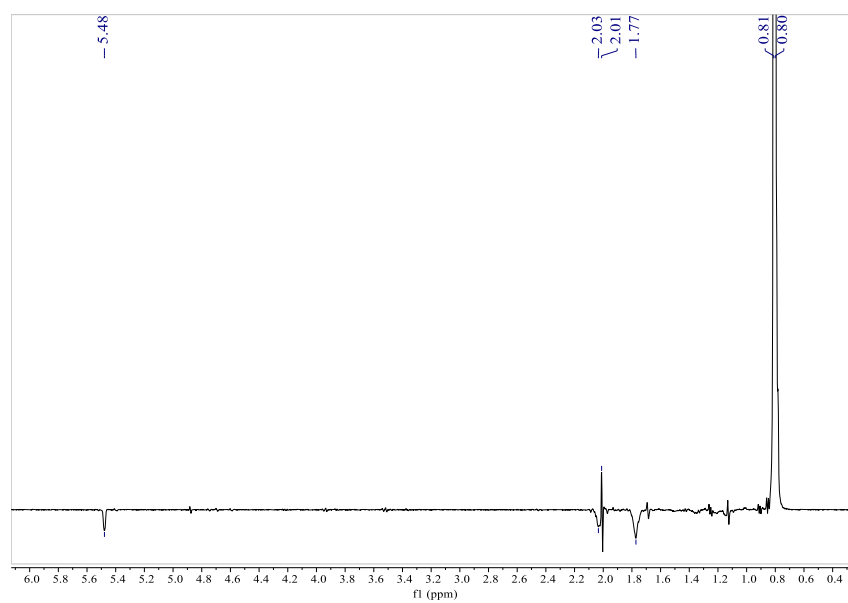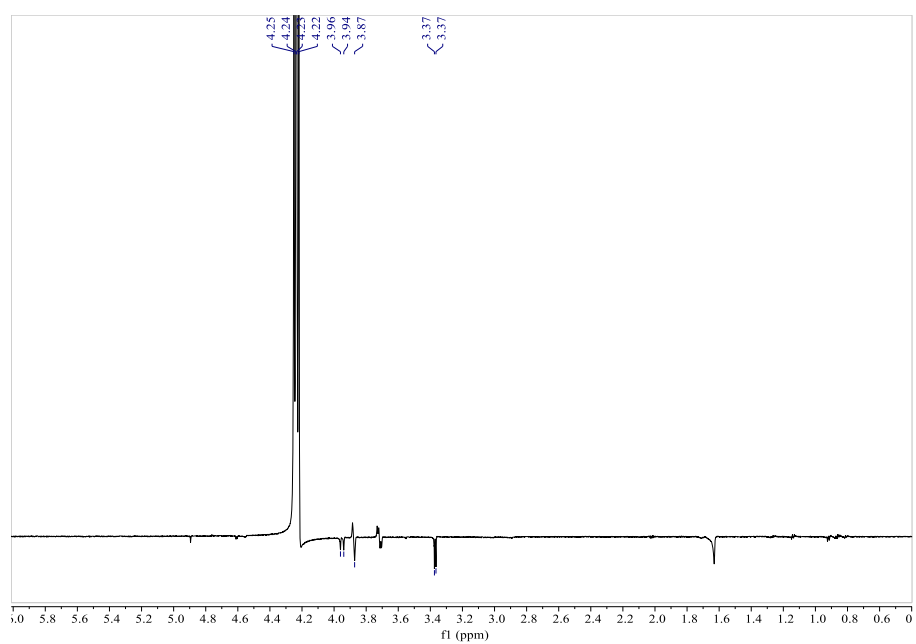

**Figure S32 1D-NOE spectrum of Lemnadiolbourside A (4) (600 MHz; CDCl<sub>3</sub>)**



### 3.5 Spectroscopic data for Lemnadiolbourside B (5)

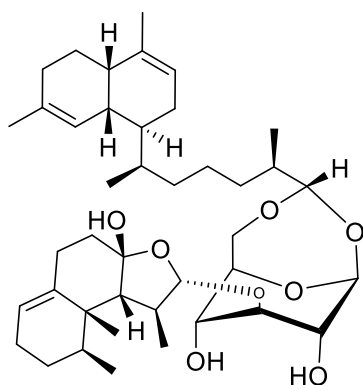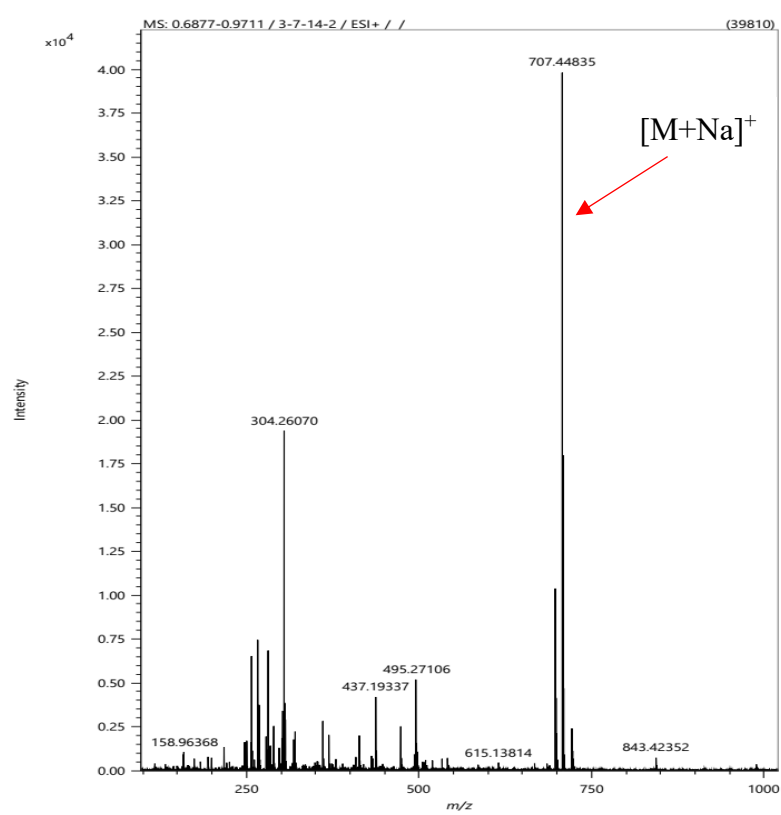

Figure S33 HRESIMS Spectrum of Lemnadiolbourside B (5)

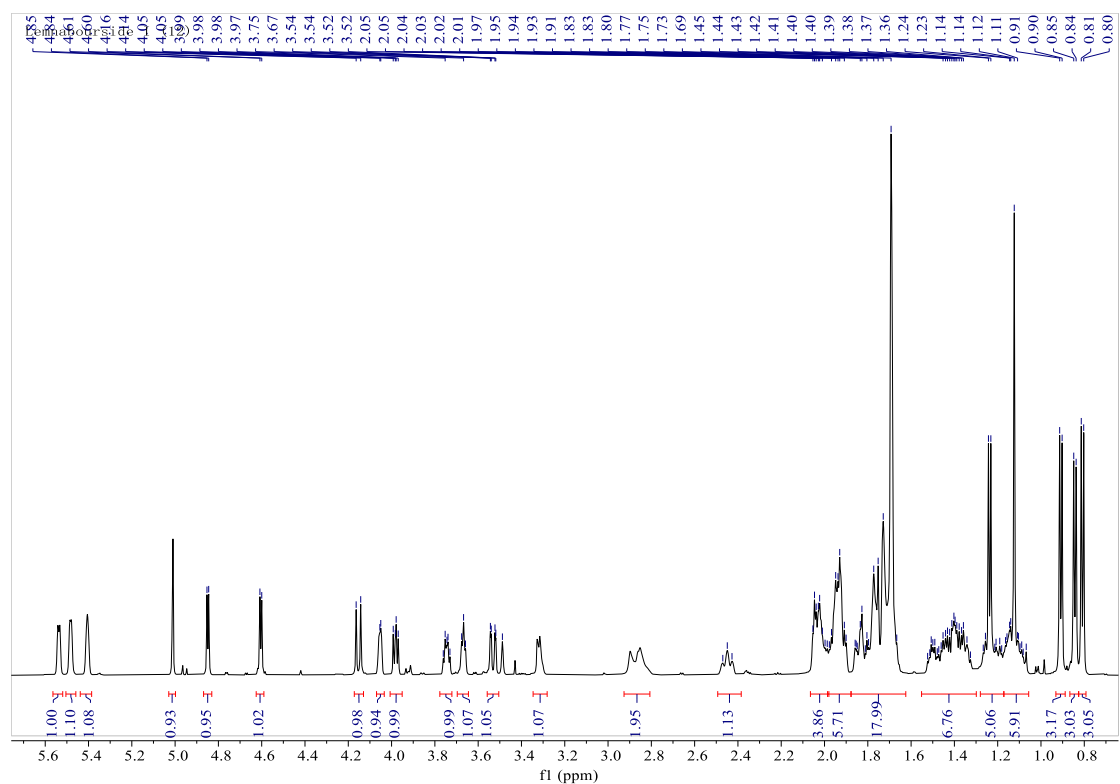

**Figure S34**  $^1\text{H}$  NMR Spectrum of Lemnadiolbourside B (5) (600 MHz;  $\text{CDCl}_3$ )

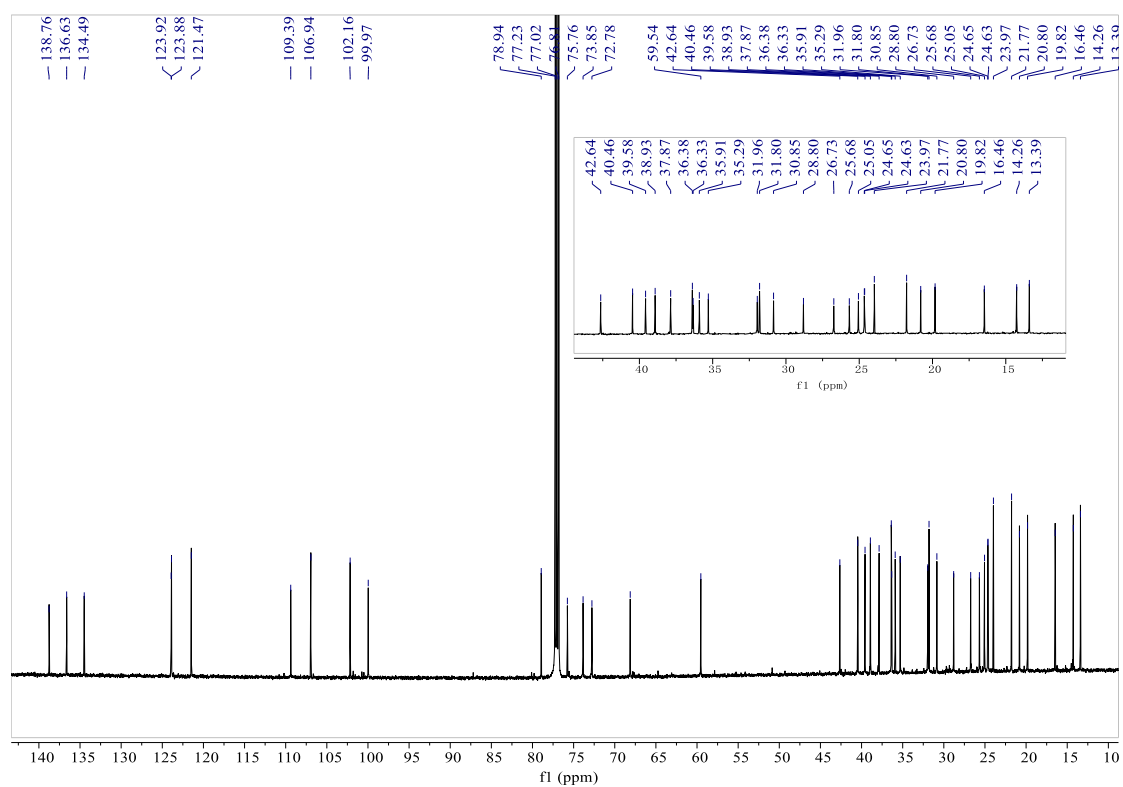

**Figure S35**  $^{13}\text{C}$  NMR Spectrum of Lemnadiolbourside B (5) (150 MHz;  $\text{CDCl}_3$ )

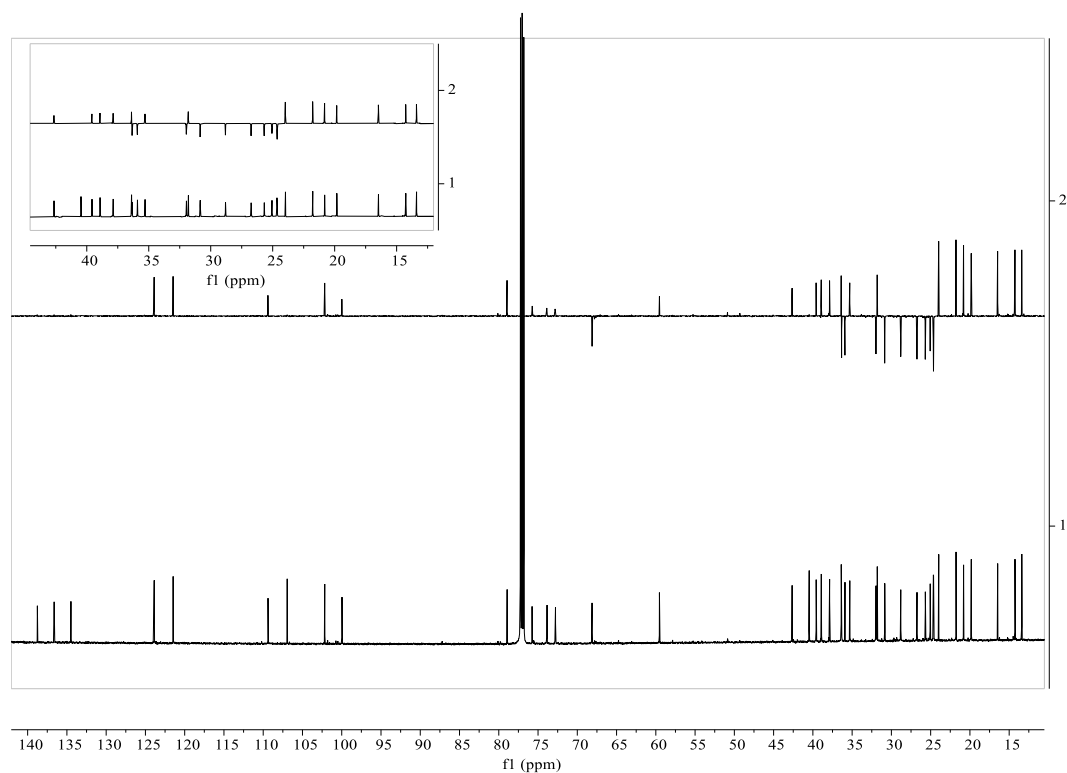

**Figure S36** Dept  $135^\circ$  NMR Spectrum of Lemnadiolbourside B (5) (150 MHz;  $\text{CDCl}_3$ )

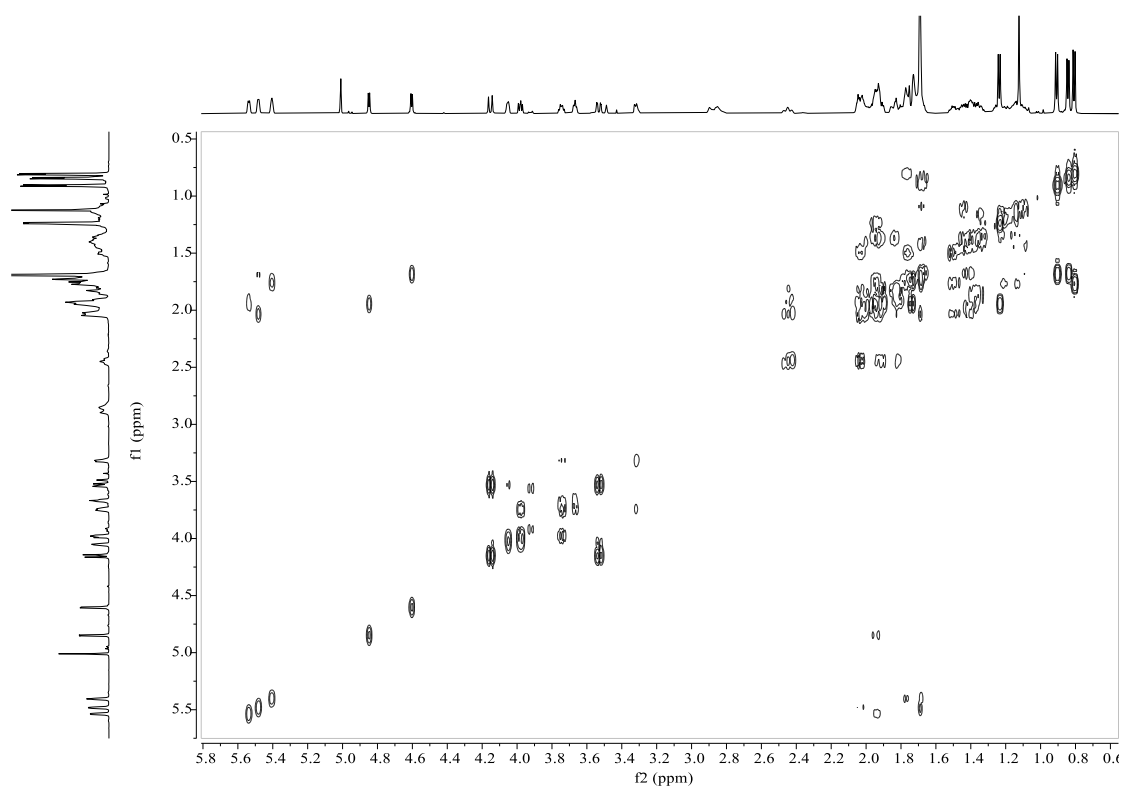

**Figure S37  $^1\text{H}$ - $^1\text{H}$  COSY spectrum of Lemnadiolbourside B (5) (600 MHz;  $\text{CDCl}_3$ )**

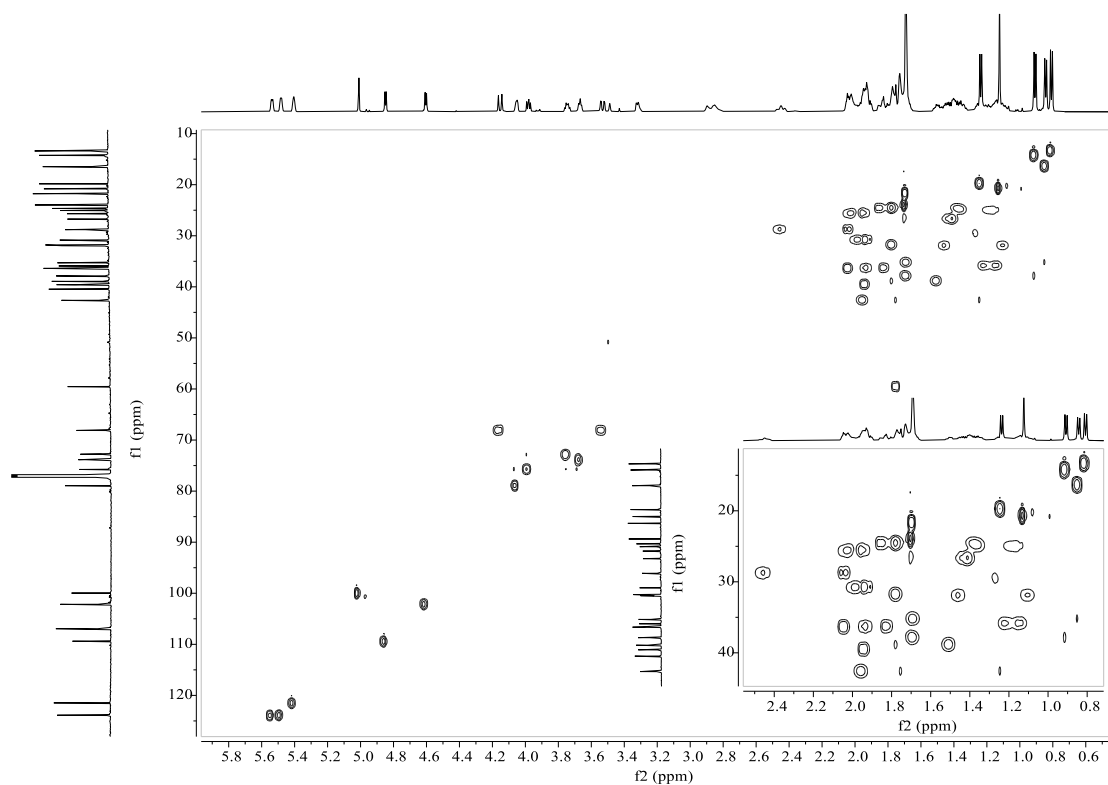

**Figure S38 HSQC spectrum of Lemnadiolbourside B (5) (600 MHz;  $\text{CDCl}_3$ )**

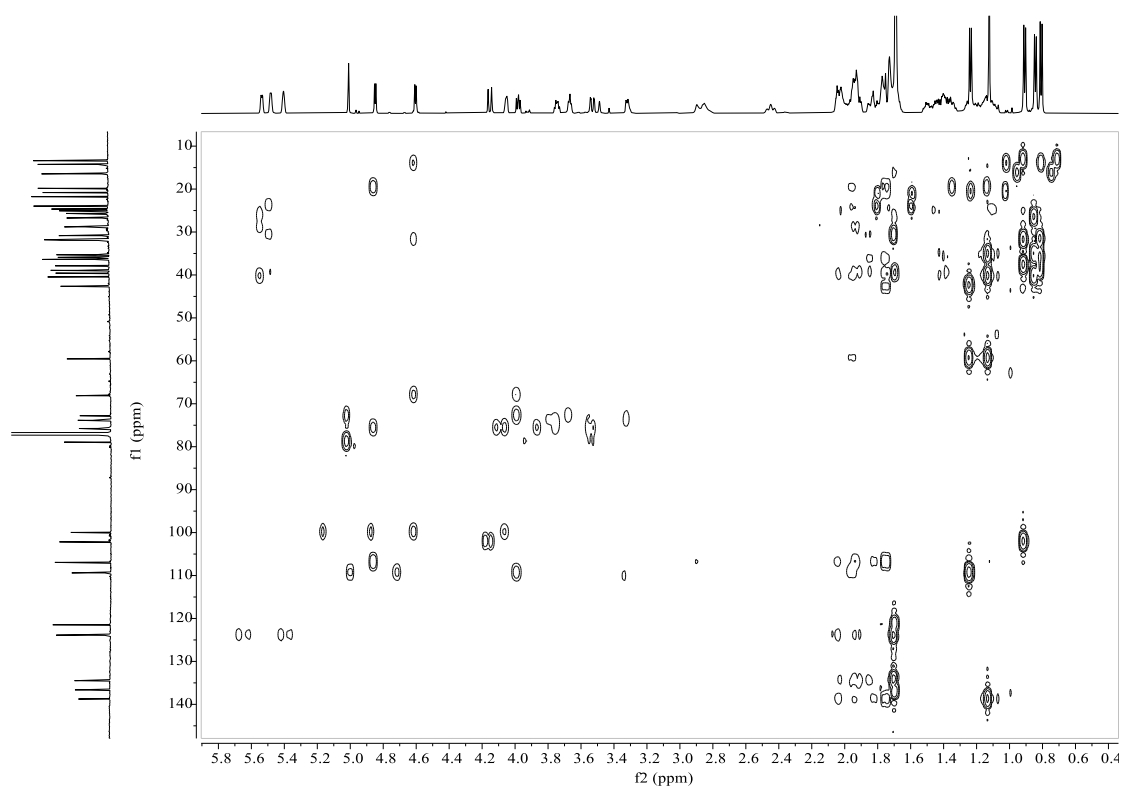

**Figure S39** HMBC spectrum of Lemnadiolbourside B (**5**) (600 MHz; CDCl<sub>3</sub>)

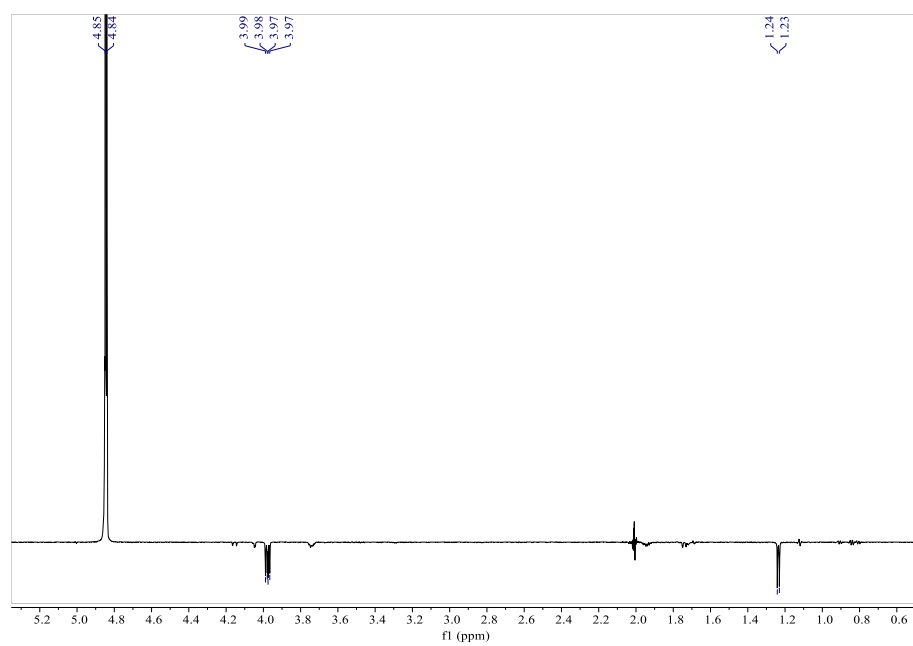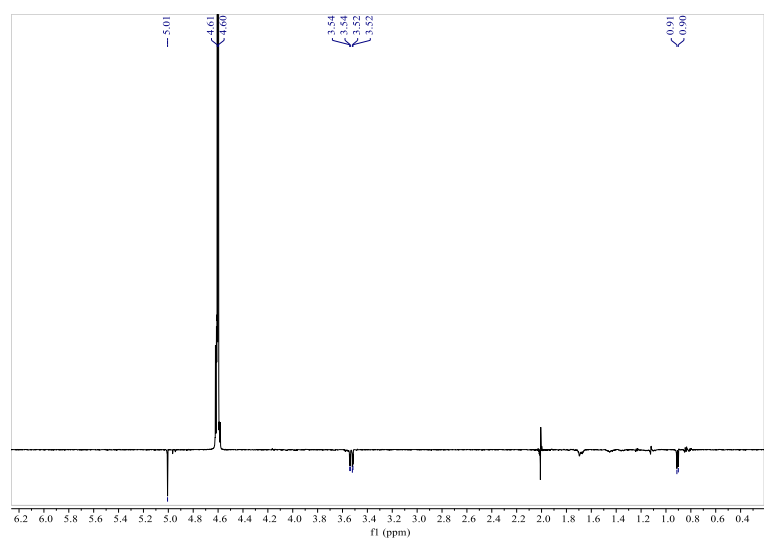

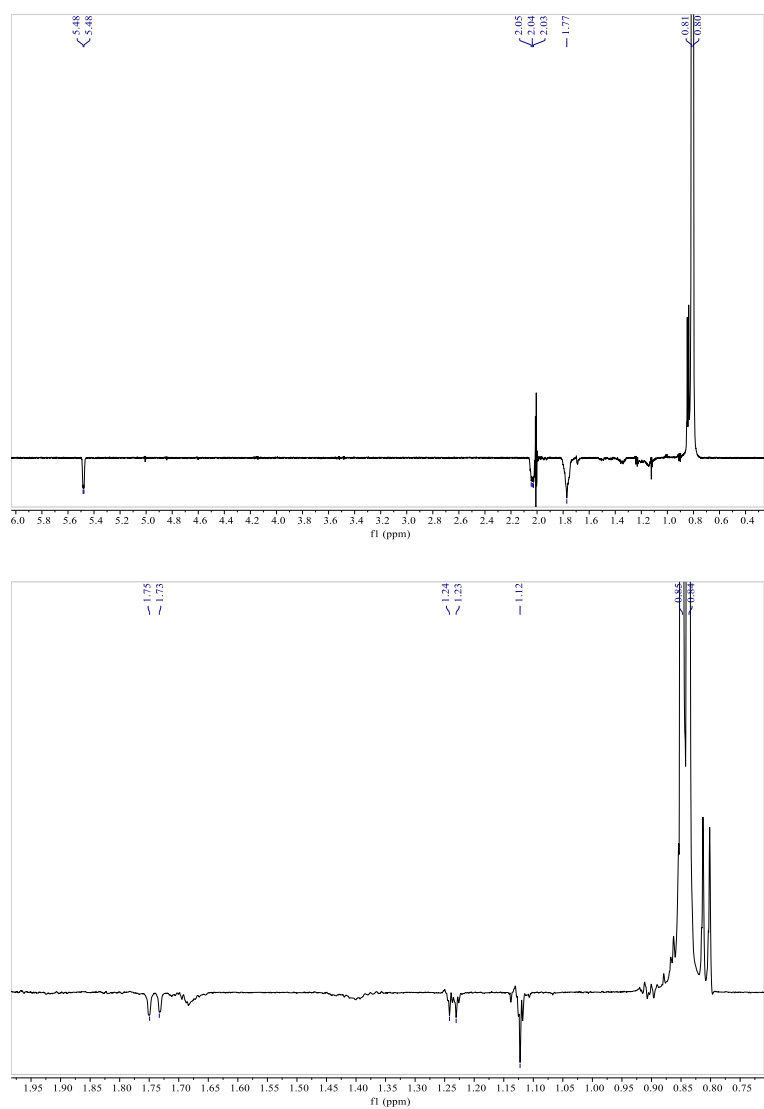

**Figure S40 1D-NOE spectrum of Lemnadiolbourside B (5) (600 MHz; CDCl<sub>3</sub>)**

### 3.6 Spectroscopic data for Lemnadiolbourside C (6)

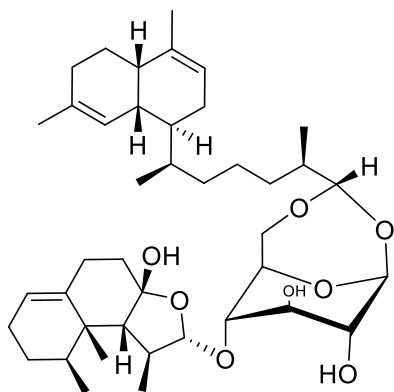

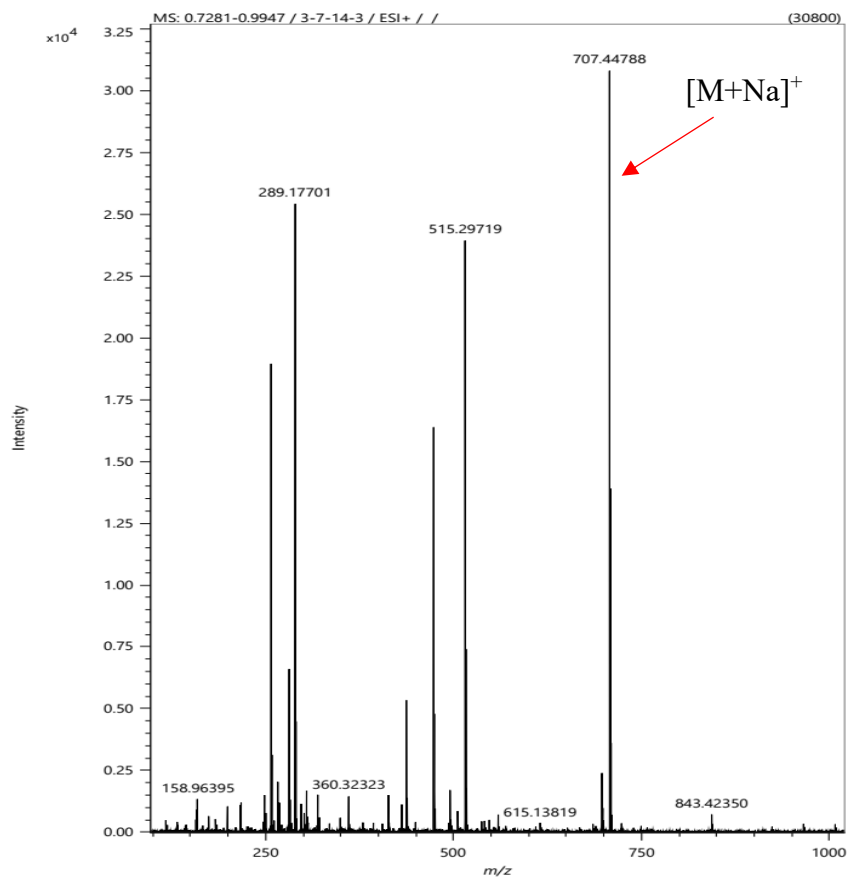

**Figure S41 HRESIMS Spectrum of Lemnadiolbourside C (6)**

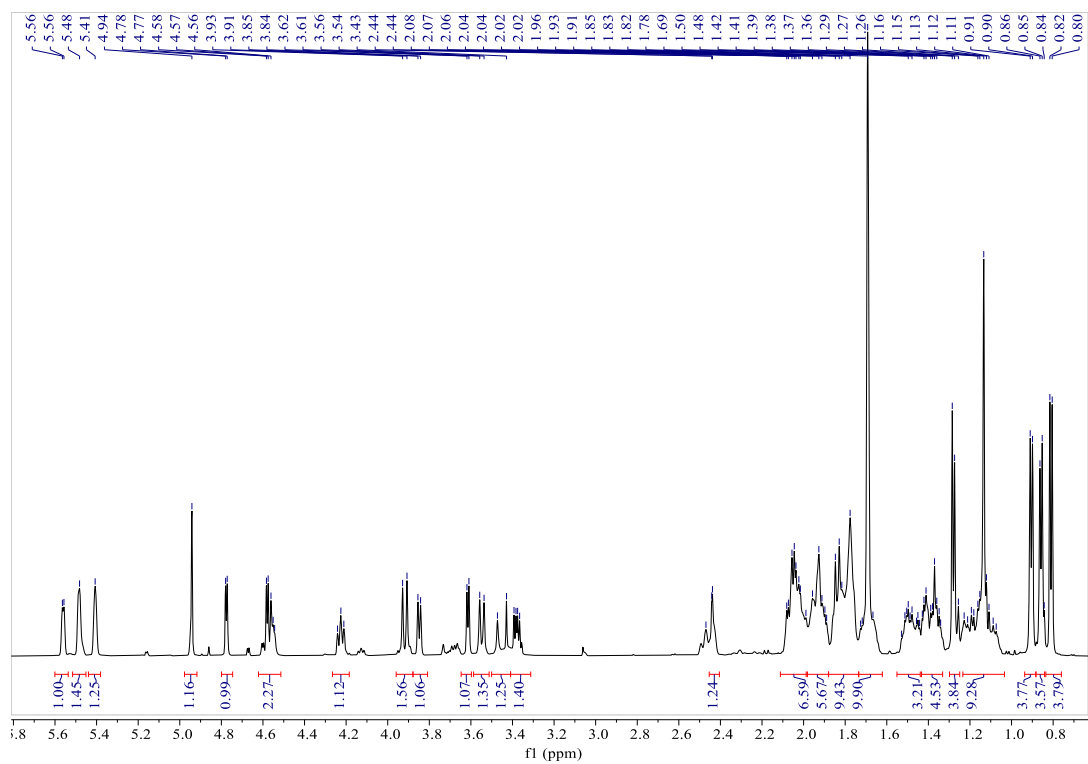

**Figure S42  $^1\text{H}$  NMR Spectrum of Lemnadiolbourside C (6) (600 MHz;  $\text{CDCl}_3$ )**

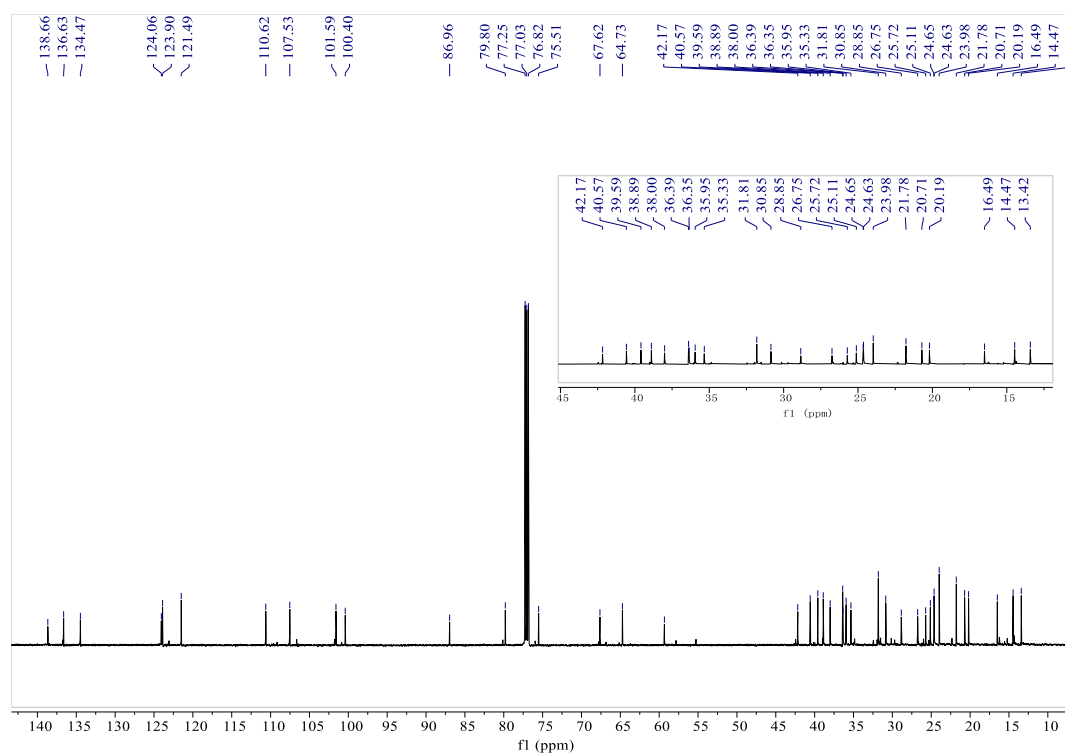

**Figure S43  $^{13}\text{C}$  NMR Spectrum of Lemnadiolbourside C (6) (150 MHz;  $\text{CDCl}_3$ )**

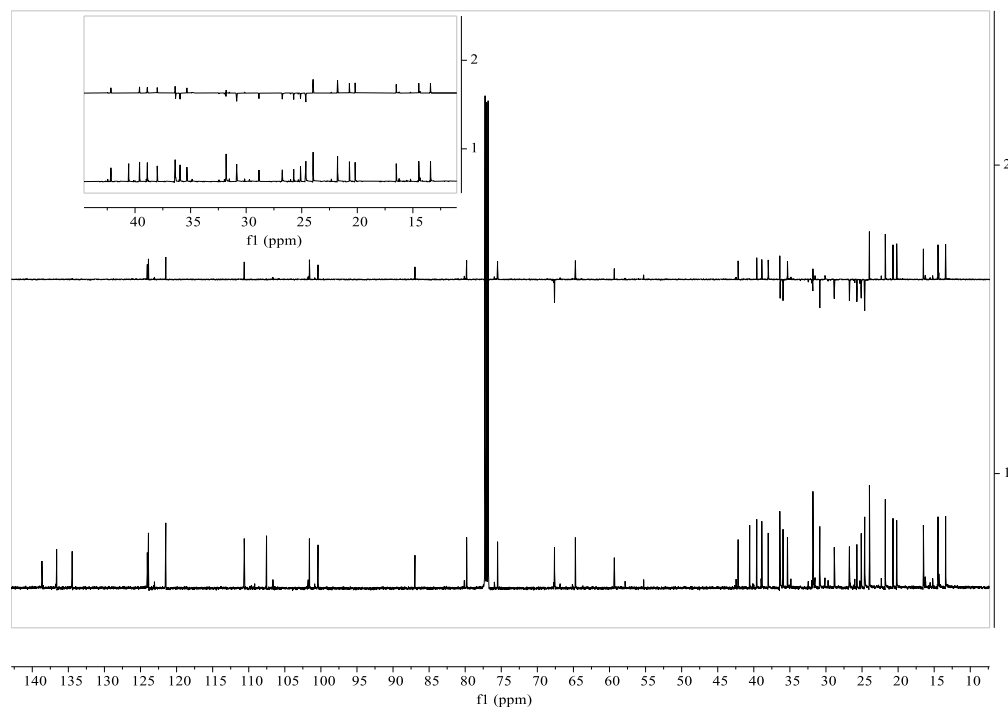

**Figure S44 Dept  $^{135}^\circ$  NMR Spectrum of Lemnadiolbourside C (6) (150 MHz;  $\text{CDCl}_3$ )**



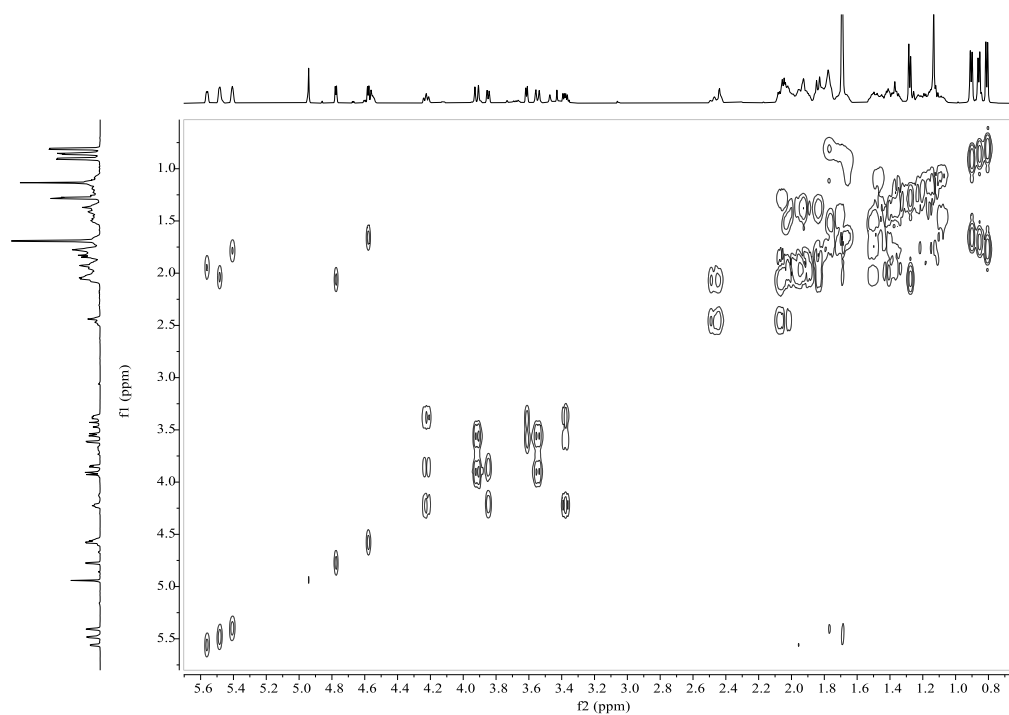

**Figure S45  $^1\text{H}$ - $^1\text{H}$  COSY spectrum of Lemnadiolbourside C (6) (600 MHz;  $\text{CDCl}_3$ )**

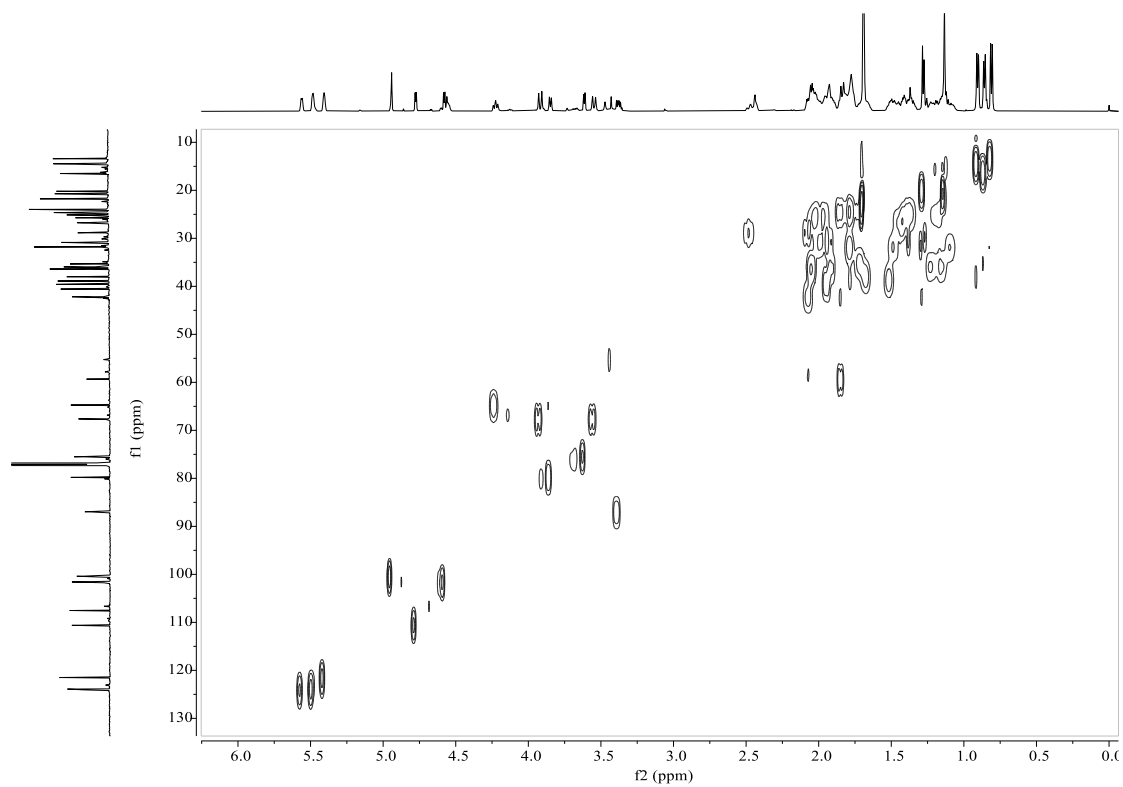

**Figure S46 HSQC spectrum of Lemnadiolbourside C (6) (600 MHz;  $\text{CDCl}_3$ )**

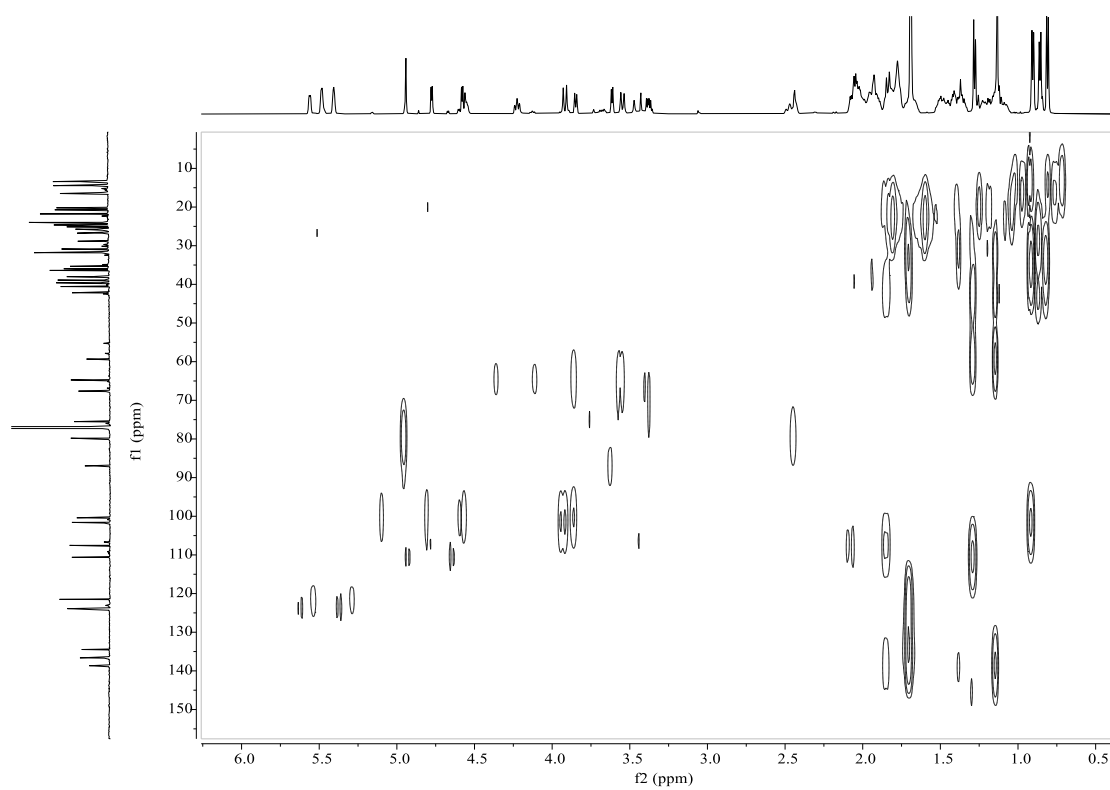

**Figure S47 HMBC spectrum of Lemnadiolbourside C (6) (600 MHz;  $\text{CDCl}_3$ )**

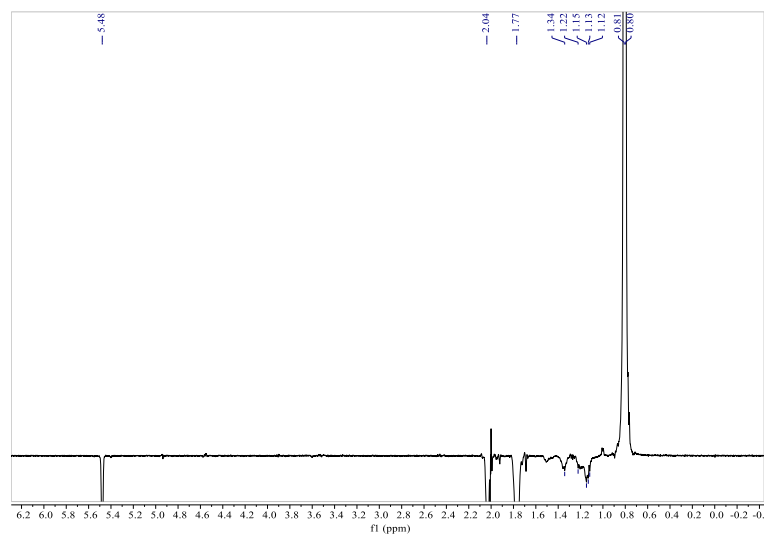

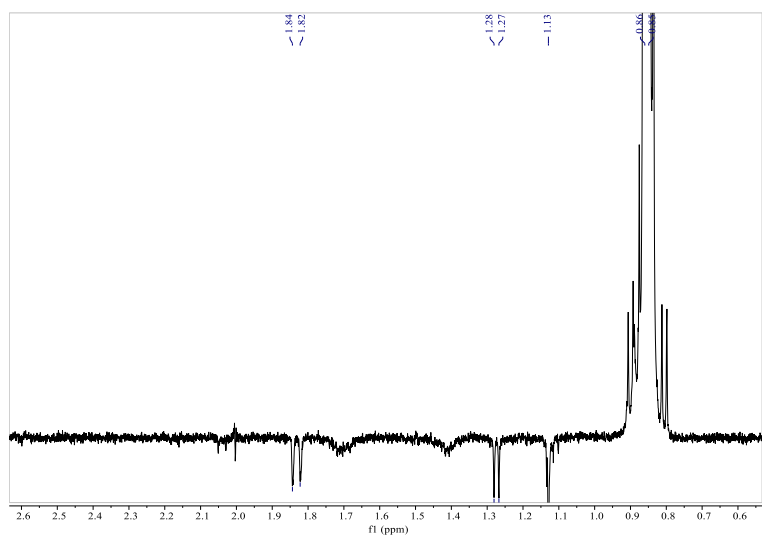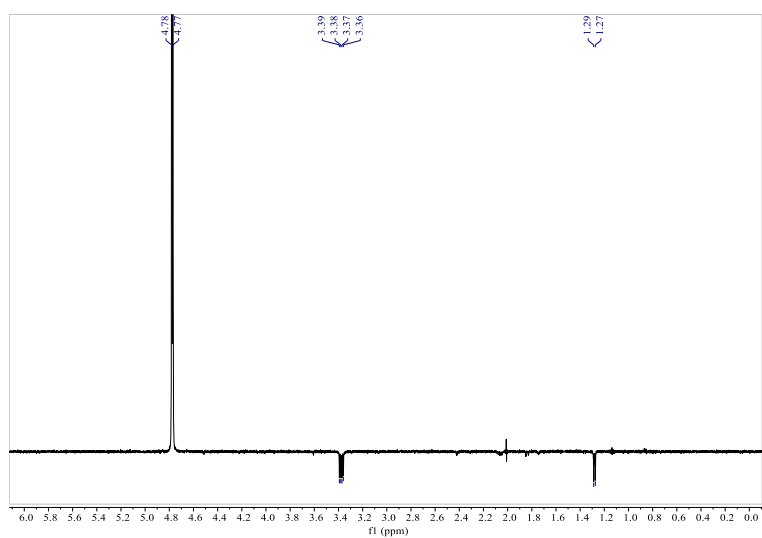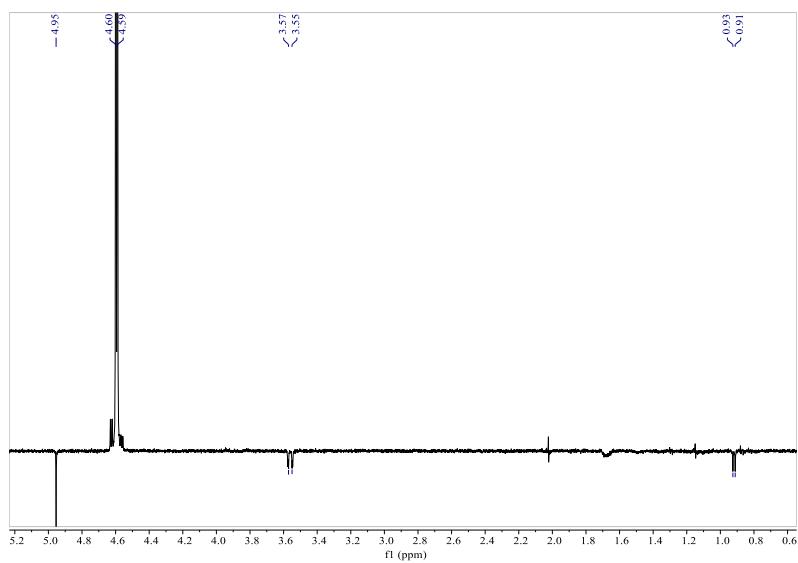

Figure S48 1D-NOE spectrum of Lemnadiolbourside C (6) (600 MHz; CDCl<sub>3</sub>)

#### 4. NMR spectra of the known isolated compounds

##### 4.1 Spectroscopic data for compound 7

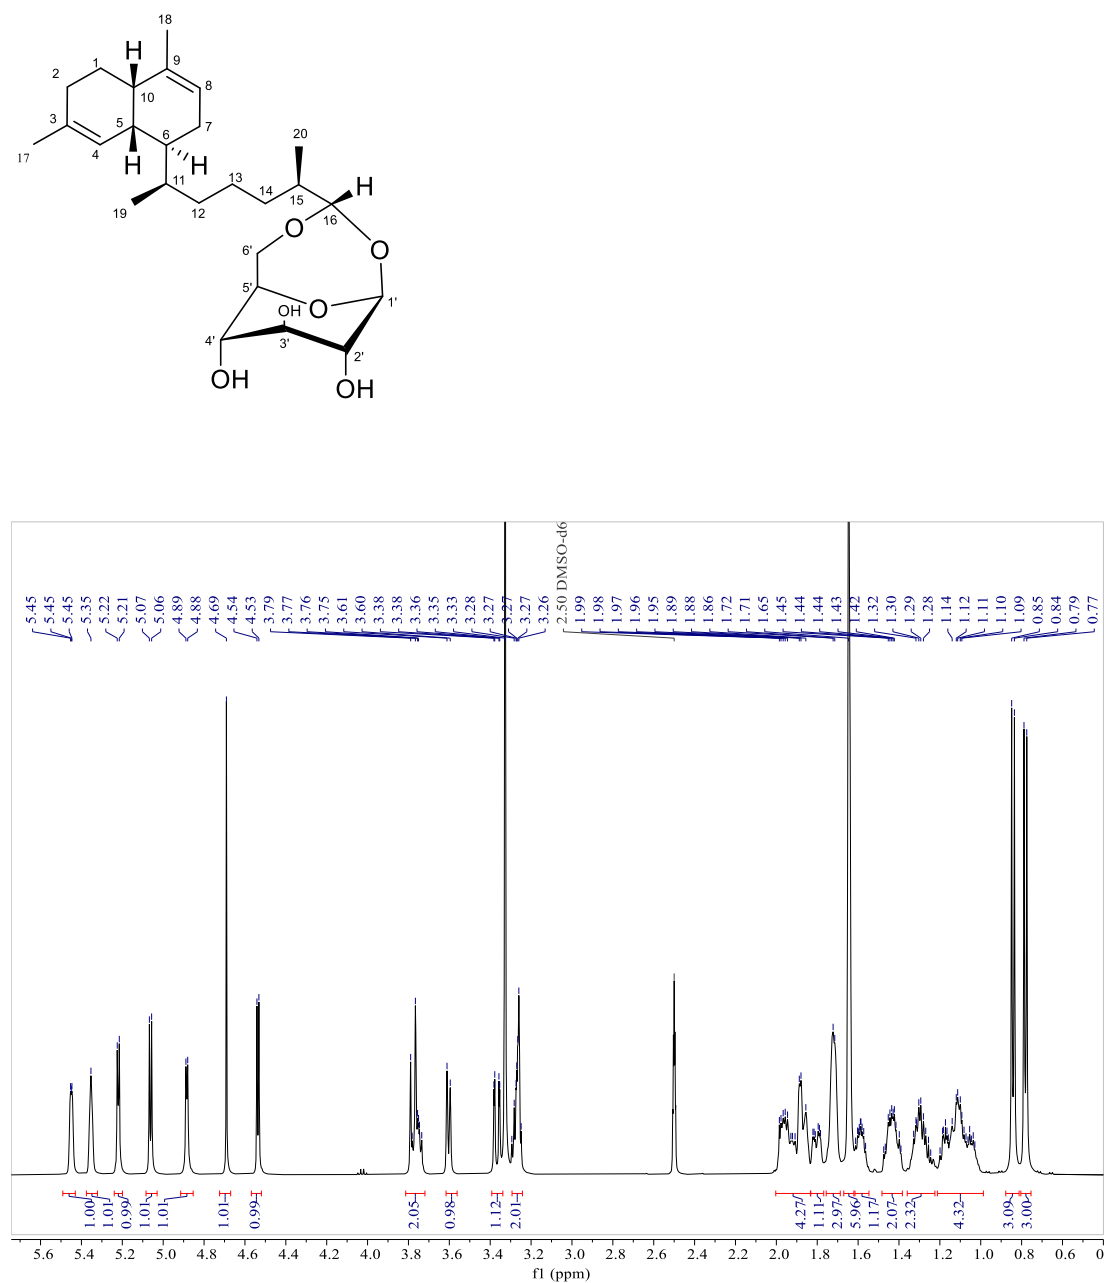

Figure S49 <sup>1</sup>H NMR Spectrum of compound 7 (600 MHz; DMSO-d<sub>6</sub>)

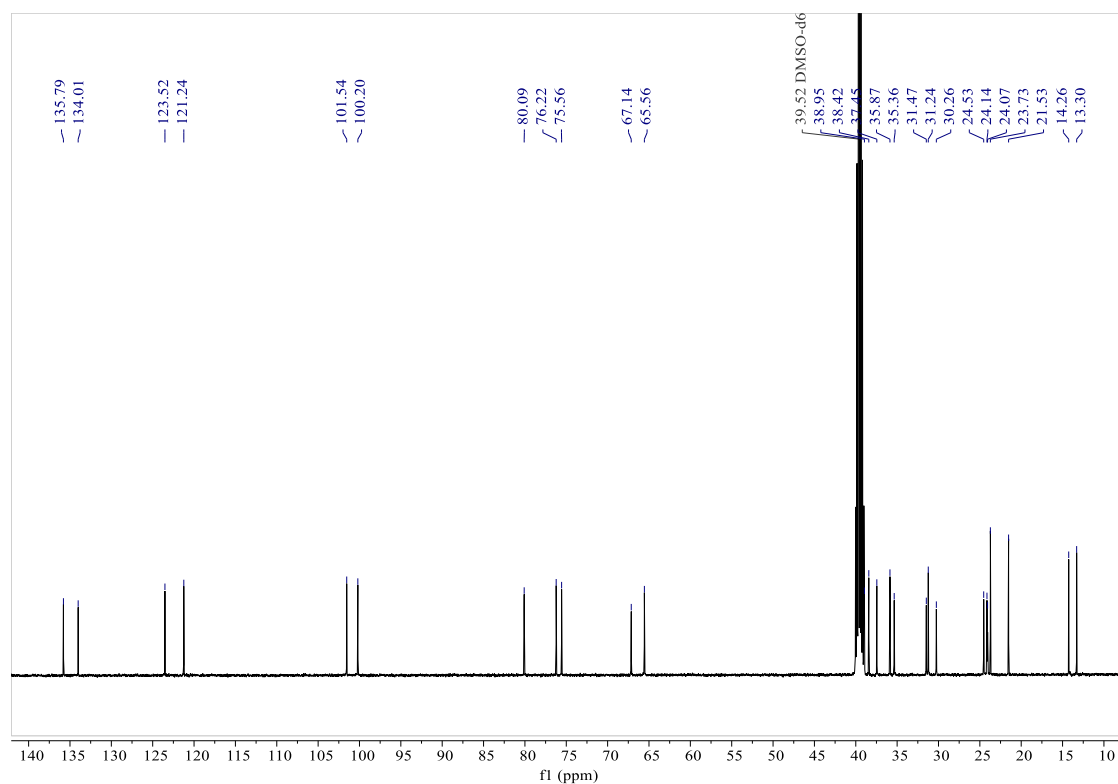

**Figure S50**  $^{13}\text{C}$  NMR Spectrum of compound **7** (150 MHz;  $\text{DMSO-d}_6$ )

## 4.2 Spectroscopic data for compound **8**

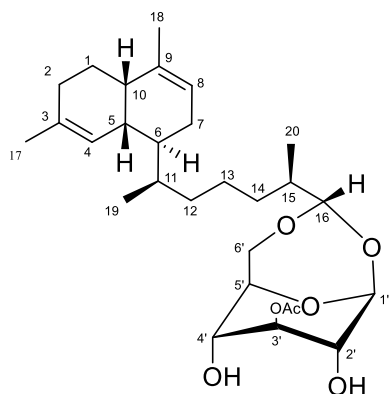

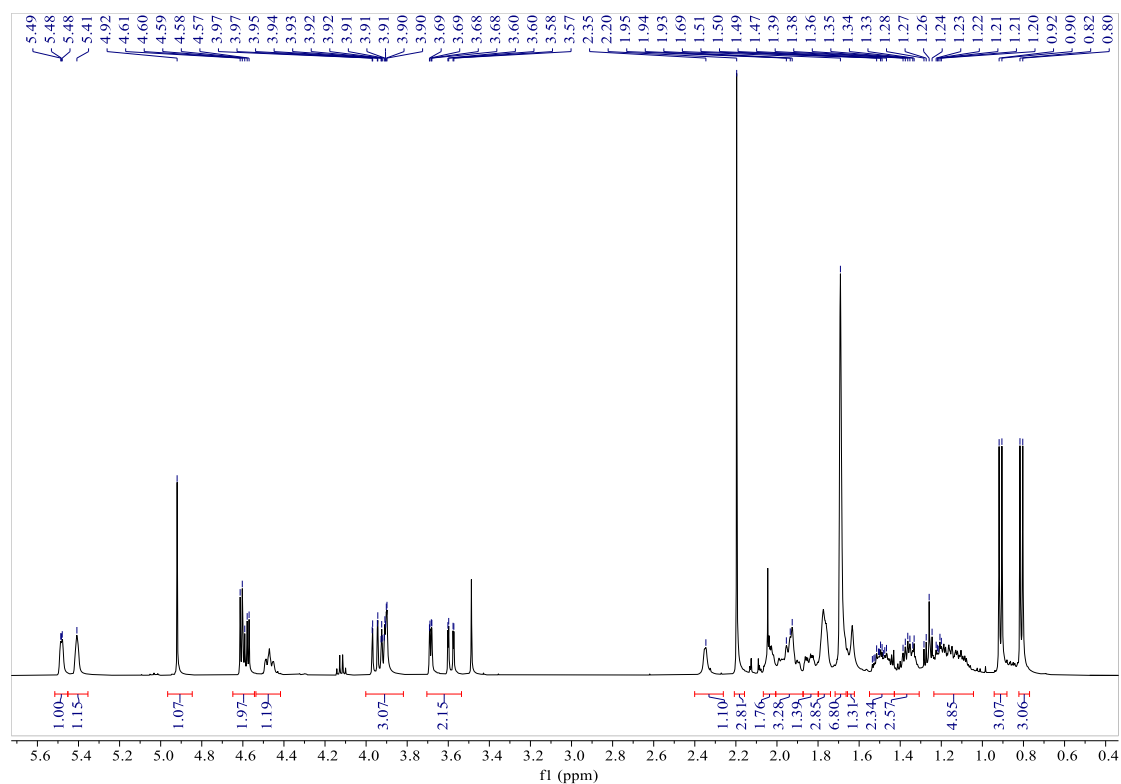

**Figure S51 <sup>1</sup>H NMR Spectrum of compound 8 (600 MHz; CDCl<sub>3</sub>)**

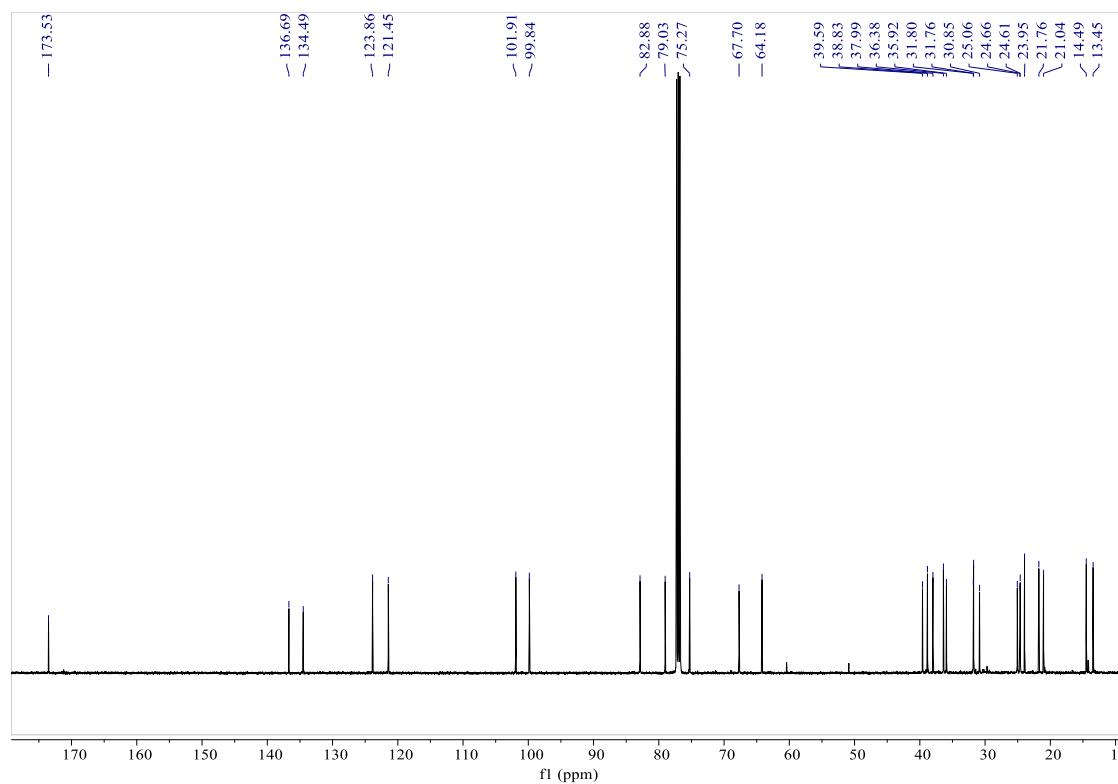

**Figure S52 <sup>13</sup>C NMR Spectrum of compound 8 (150 MHz; CDCl<sub>3</sub>)**

### 4.3 Spectroscopic data for compound 9

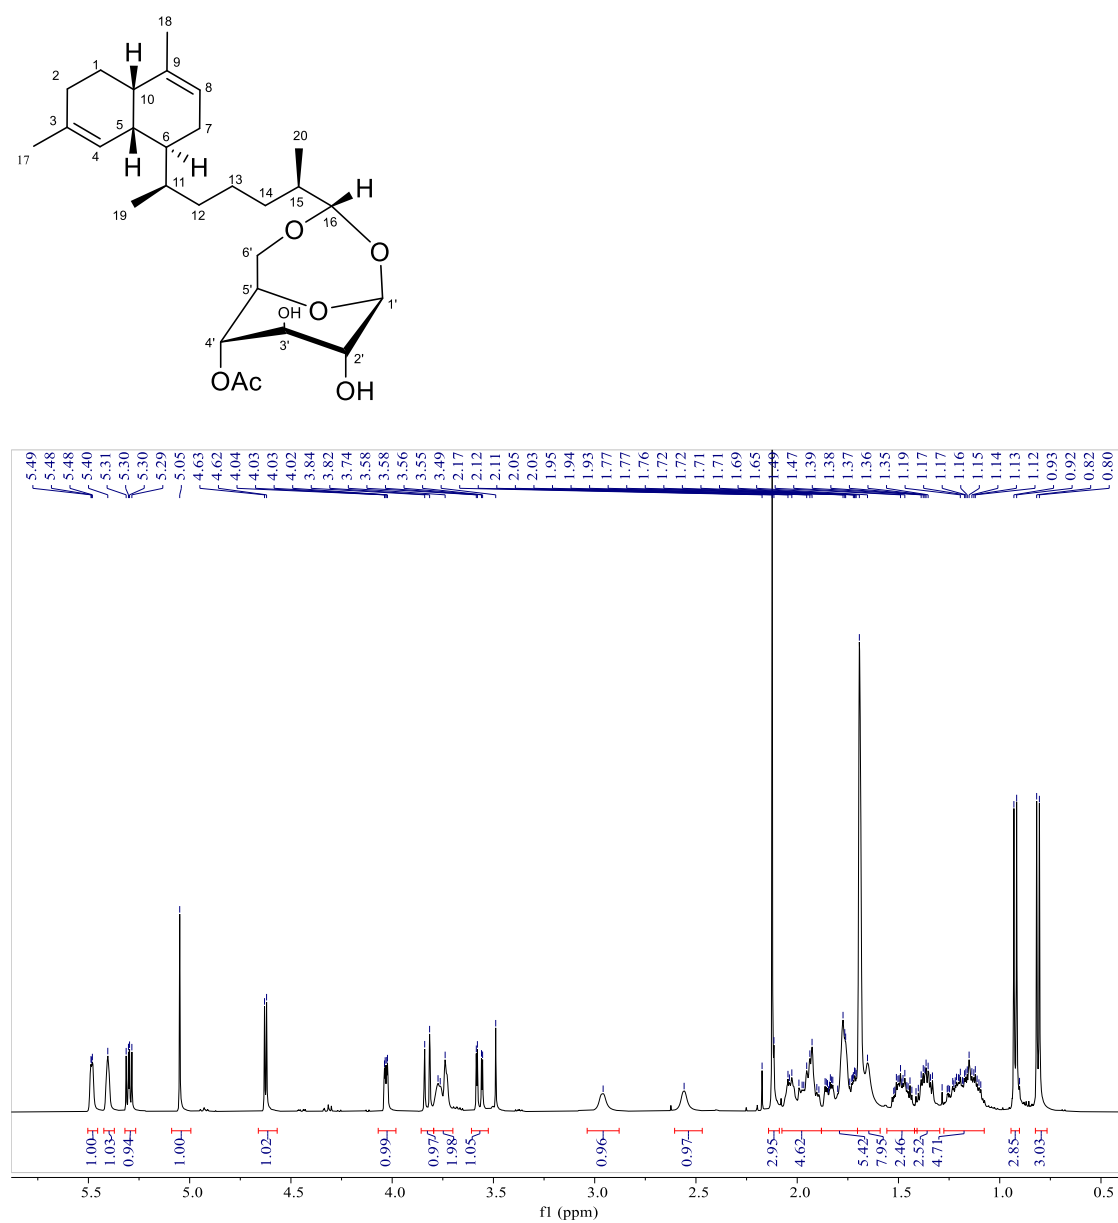

**Figure S53  $^1\text{H}$  NMR Spectrum of compound 9 (600 MHz;  $\text{CDCl}_3$ )**

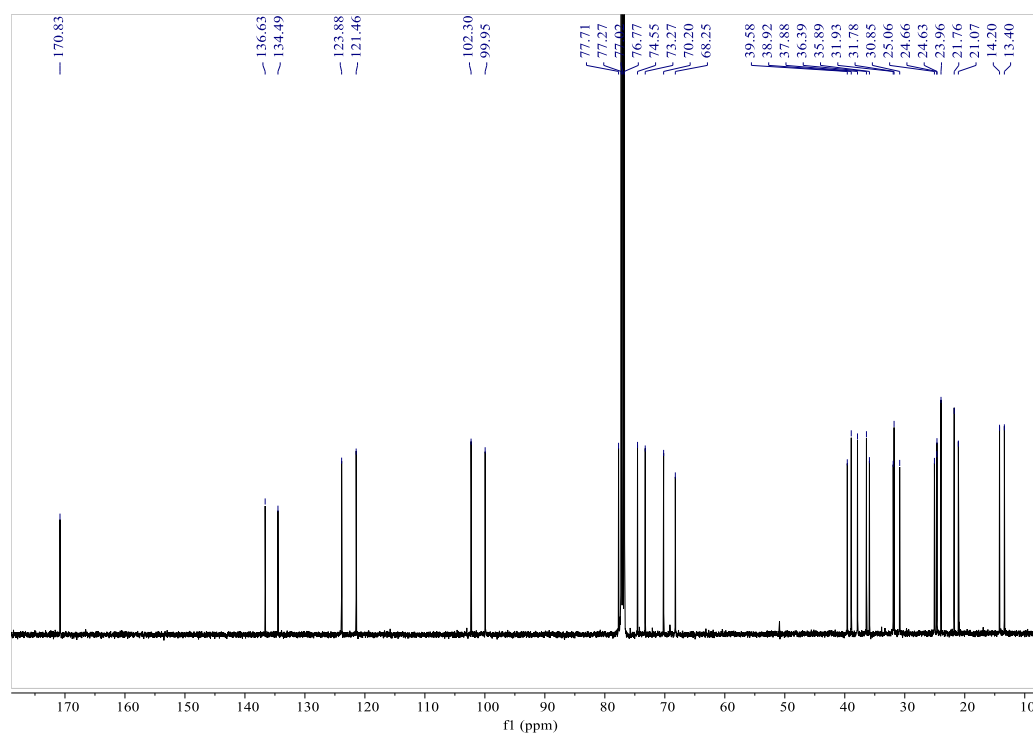

**Figure S54  $^{13}\text{C}$  NMR Spectrum of compound 9 (150 MHz;  $\text{CDCl}_3$ )**

**2.  $^1\text{H}$  NMR data for bicyclic diterpene aldehyde aglycon and bicyclic diterpene alcohol aglycon**

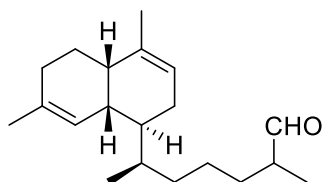



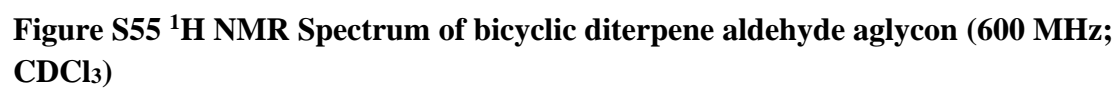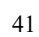

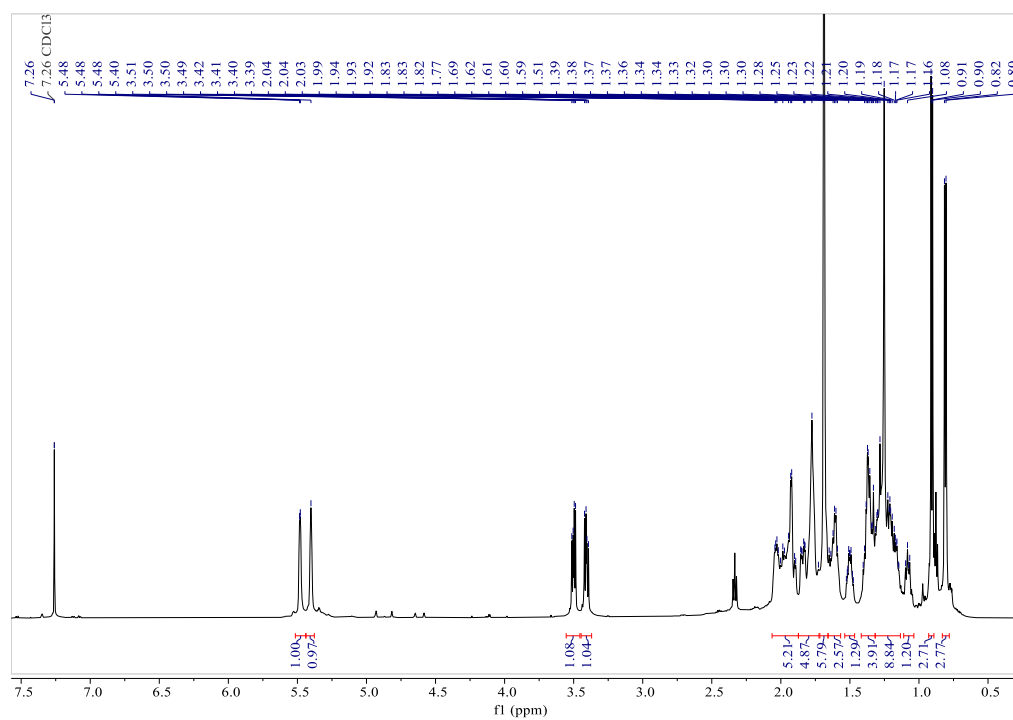

**Figure S56  $^1\text{H}$  NMR Spectrum of aglycon of bicyclic diterpene alcohol aglycon (600 MHz;  $\text{CDCl}_3$ )**

## 6. HPLC chromatograms of the sugar derivatives of compounds 1-6 and the standard D-glucose

D-GLU

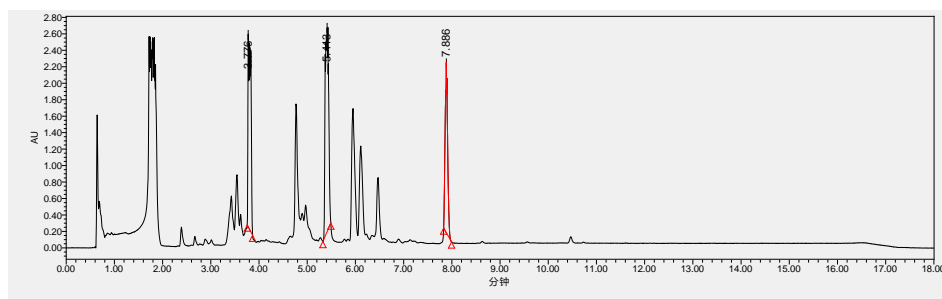

Compound 1

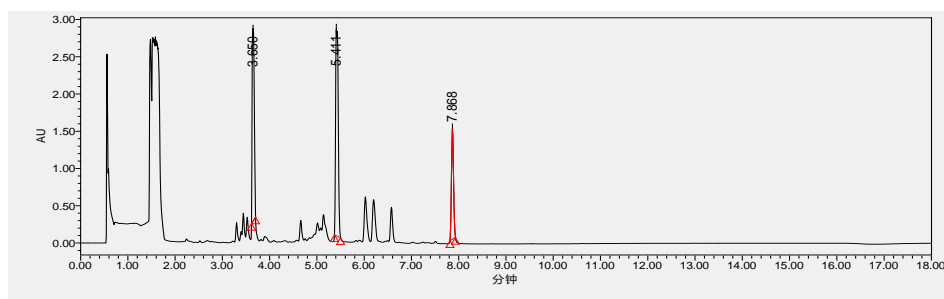

Compound 2

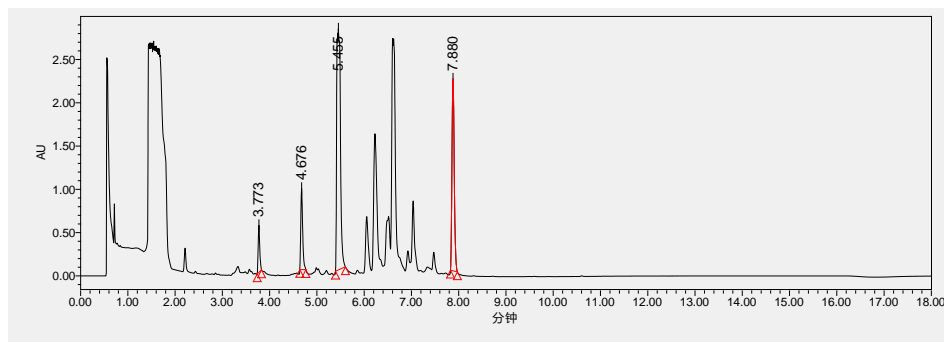

Compound 3

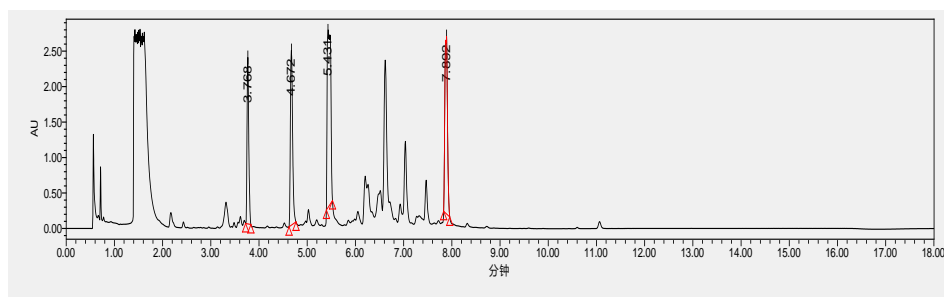

Compound 4

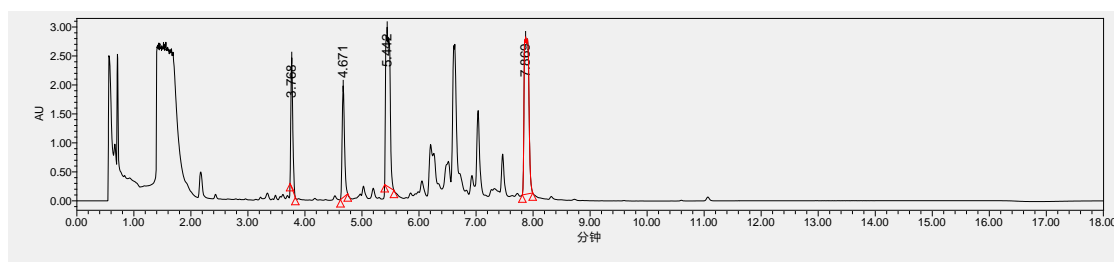

Compound 5

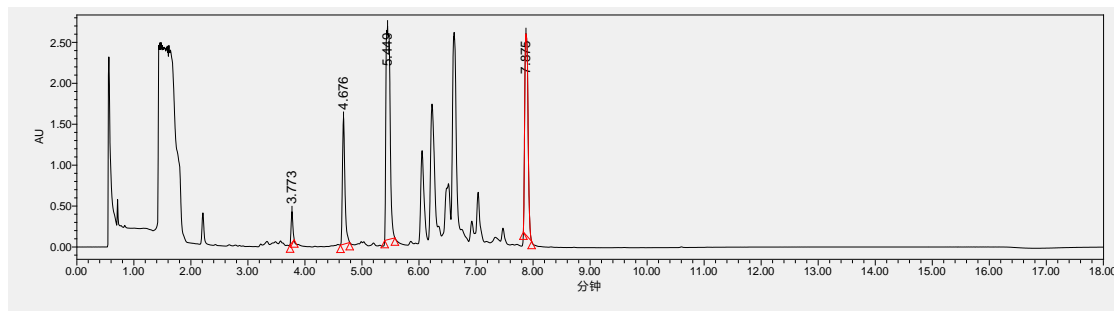

Compound 6

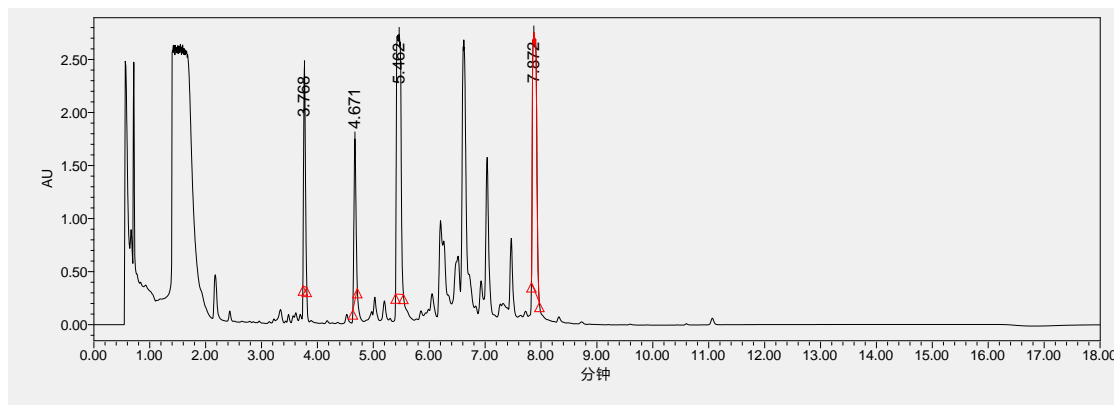

**Figure S57 HPLC chromatograms of the sugar derivatives of compounds 1-6 and the standard D-glucose**

7. Photos of *Lemnalia bournei* underwater and fresh sample after collected

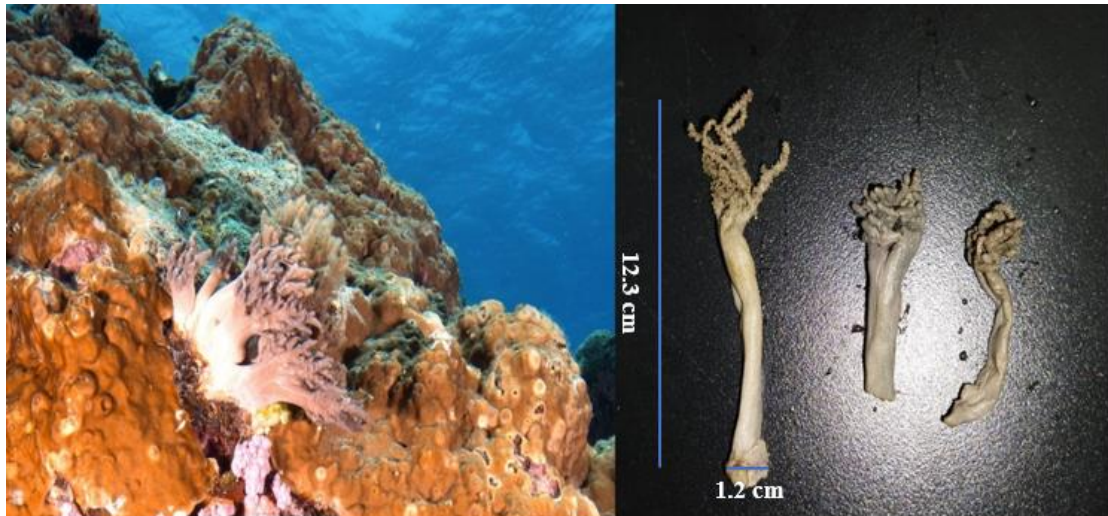

Figure S58 Photos of *Lemnalia bournei* underwater and fresh sample after collected

8. Photomicrographs of the spicules extracted from *Lemnalia bournei*

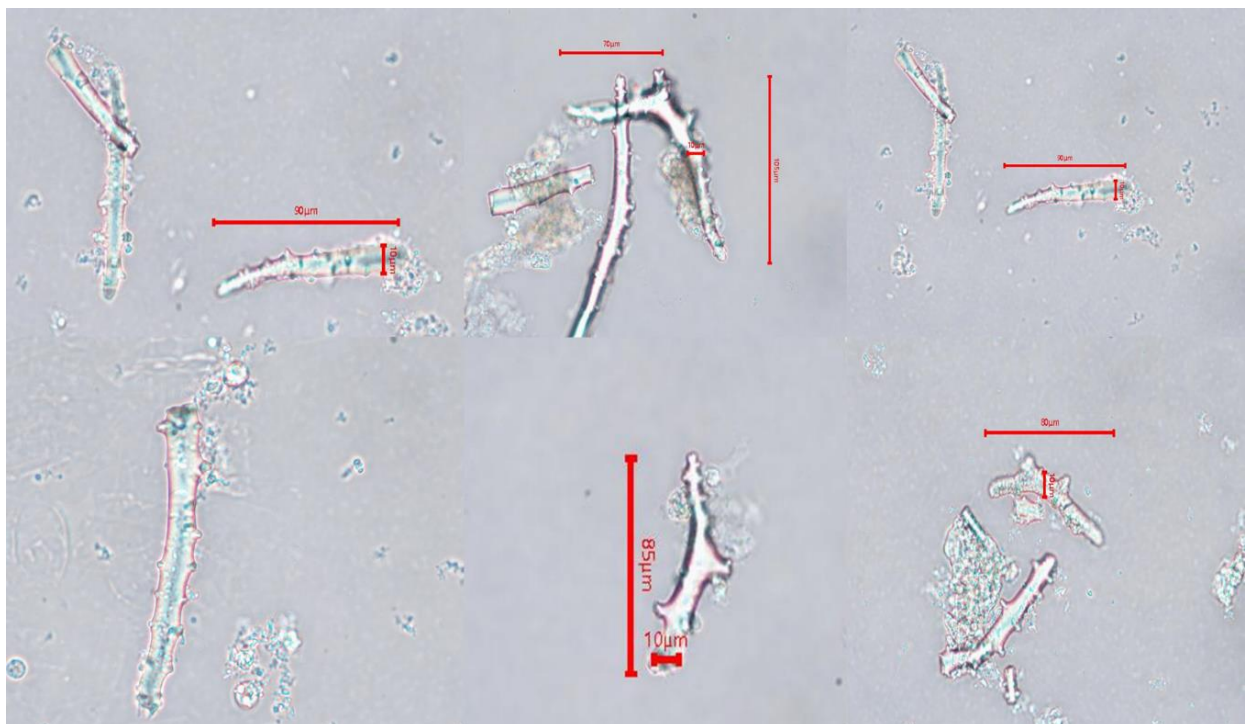

Figure S59 Photomicrographs of the spicules extracted from the soft coral. a) spicules from the tentacles; b) spicules from the cortex of the distal part of the stem; c) spicules from the cortex of the distal part of the stem
